# Supplementary material for: PPAR-γ agonists reactivate the ALDOC-NR2F1 axis to enhance sensitivity to temozolomide and suppress glioblastoma progression
Source: PubMed Central journal article supplement (PMC11089732; doi:10.1186/s12964-024-01645-3), 2024-05-13
Supplement: 12964_2024_1645_MOESM2_ESM.pdf [file 12964_2024_1645_MOESM2_ESM.pdf]

**Supplementary Table S1. A list of transcriptome probes based on ALDOC knockdown.**

| Probe Set ID | FC (U87) | Log FC (U87) | FC (abs) (U87) | Regulation | FC (U87) | Log FC (U87) | FC (abs) (U87) | Regulation | U87 con.C | U87 shAL | U87 shAL | Gene Symbol             |
|--------------|----------|--------------|----------------|------------|----------|--------------|----------------|------------|-----------|----------|----------|-------------------------|
| 1565823 at   | -1.54968 | -0.63197     | 1.549677       | down       | -1.58271 | -0.66239     | 1.582705       | down       | 0         | -0.63197 | -0.66239 | 7-Sep                   |
| 230071 at    | -1.52074 | -0.60477     | 1.520735       | down       | -1.70225 | -0.76745     | 1.702254       | down       | 0         | -0.60477 | -0.76745 | 11-Sep                  |
| 222689 at    | -1.67461 | -0.74383     | 1.67461        | down       | -1.52749 | -0.61116     | 1.52749        | down       | 0         | -0.74383 | -0.61116 | ACER3                   |
| 1557418 at   | -1.56662 | -0.64766     | 1.566623       | down       | -1.88563 | -0.91505     | 1.885634       | down       | 0         | -0.64766 | -0.91505 | ACSL4                   |
| 202666 s at  | -1.65061 | -0.723       | 1.650608       | down       | -1.74966 | -0.80708     | 1.749661       | down       | 0         | -0.723   | -0.80708 | ACTL6A                  |
| 213411 at    | -1.82796 | -0.87024     | 1.827963       | down       | -1.65001 | -0.72248     | 1.650012       | down       | 0         | -0.87024 | -0.72248 | ADAM22                  |
| 232395 x at  | -1.91252 | -0.93547     | 1.912519       | down       | -1.67225 | -0.74179     | 1.672251       | down       | 0         | -0.93547 | -0.74179 | AGBL3                   |
| 228932 at    | -1.55388 | -0.63588     | 1.55388        | down       | -1.5903  | -0.6693      | 1.5903         | down       | 0         | -0.63588 | -0.6693  | AGO3                    |
| 205002 at    | -1.50088 | -0.58581     | 1.500881       | down       | -1.50088 | -0.58581     | 1.500881       | down       | 0         | -0.58581 | -0.58581 | AHDC1                   |
| 226665 at    | -1.70974 | -0.77378     | 1.709744       | down       | -1.52145 | -0.60545     | 1.521449       | down       | 0         | -0.77378 | -0.60545 | AHSA2                   |
| 225342 at    | -1.50849 | -0.5931      | 1.508487       | down       | -1.73787 | -0.79732     | 1.737871       | down       | 0         | -0.5931  | -0.79732 | AK4                     |
| 209160 at    | -1.58184 | -0.6616      | 1.581836       | down       | -1.7802  | -0.83204     | 1.780199       | down       | 0         | -0.6616  | -0.83204 | AKR1C3                  |
| 202022 at    | -2.7126  | -1.43968     | 2.712603       | down       | -1.71941 | -0.78191     | 1.719406       | down       | 0         | -1.43968 | -0.78191 | ALDOC                   |
| 228941 at    | -1.95323 | -0.96586     | 1.953233       | down       | -2.08693 | -1.06138     | 2.086932       | down       | 0         | -0.96586 | -1.06138 | ALG10B                  |
| 242900 at    | -1.7421  | -0.80083     | 1.7421         | down       | -1.91807 | -0.93965     | 1.918068       | down       | 0         | -0.80083 | -0.93965 | ALG10B                  |
| 235926 at    | -1.74437 | -0.8027      | 1.744366       | down       | -1.74687 | -0.80477     | 1.746869       | down       | 0         | -0.8027  | -0.80477 | ANAPC5                  |
| 220076 at    | -1.87975 | -0.91054     | 1.87975        | down       | -1.74166 | -0.80046     | 1.741661       | down       | 0         | -0.91054 | -0.80046 | ANKH                    |
| 220940 at    | -2.04122 | -1.02943     | 2.041221       | down       | -2.08482 | -1.05993     | 2.084824       | down       | 0         | -1.02943 | -1.05993 | ANKRD36B                |
| 226641 at    | -2.94408 | -1.55782     | 2.944081       | down       | -1.65192 | -0.72414     | 1.651921       | down       | 0         | -1.55782 | -0.72414 | ANKRD44                 |
| 228471 at    | -2.01536 | -1.01104     | 2.015358       | down       | -1.66771 | -0.73787     | 1.667707       | down       | 0         | -1.01104 | -0.73787 | ANKRD44                 |
| 201038 s at  | -1.55073 | -0.63295     | 1.550734       | down       | -1.57873 | -0.65876     | 1.578727       | down       | 0         | -0.63295 | -0.65876 | ANP32A                  |
| 230652 at    | -1.60292 | -0.6807      | 1.602919       | down       | -1.50981 | -0.59436     | 1.509805       | down       | 0         | -0.6807  | -0.59436 | ARAF                    |
| 204492 at    | -1.50088 | -0.58581     | 1.500881       | down       | -1.5622  | -0.64358     | 1.562196       | down       | 0         | -0.58581 | -0.64358 | ARHGAP11A               |
| 1558750 a at | -1.55425 | -0.63622     | 1.554253       | down       | -1.54585 | -0.6284      | 1.545849       | down       | 0         | -0.63622 | -0.6284  | ARHGAP11B//LOC100288637 |
| 226576 at    | -1.50539 | -0.59014     | 1.505388       | down       | -2.03145 | -1.02251     | 2.031451       | down       | 0         | -0.59014 | -1.02251 | ARHGAP26                |
| 233903 s at  | -1.6804  | -0.7488      | 1.680399       | down       | -1.6804  | -0.7488      | 1.680399       | down       | 0         | -0.7488  | -0.7488  | ARHGEP26                |
| 224797 at    | -1.63489 | -0.7092      | 1.634894       | down       | -1.73138 | -0.79192     | 1.731377       | down       | 0         | -0.7092  | -0.79192 | ARRDC3                  |
| 219973 at    | -1.6216  | -0.69742     | 1.621604       | down       | -1.63202 | -0.70666     | 1.632021       | down       | 0         | -0.69742 | -0.70666 | ARSJ                    |
| 237968 at    | -1.51151 | -0.59599     | 1.511512       | down       | -1.74206 | -0.80079     | 1.742059       | down       | 0         | -0.59599 | -0.80079 | ATL2                    |
| 226302 at    | -1.76009 | -0.81565     | 1.760086       | down       | -2.03761 | -1.02688     | 2.037613       | down       | 0         | -0.81565 | -1.02688 | ATP8B1                  |
| 235240 at    | -1.51387 | -0.59824     | 1.513873       | down       | -1.54982 | -0.6321      | 1.549815       | down       | 0         | -0.59824 | -0.6321  | ATXN3                   |
| 211379 x at  | -1.55838 | -0.64005     | 1.558383       | down       | -1.51749 | -0.60168     | 1.517485       | down       | 0         | -0.64005 | -0.60168 | B3GALNT1                |
| 227051 at    | -1.81608 | -0.86083     | 1.816081       | down       | -2.18275 | -1.12615     | 2.182749       | down       | 0         | -0.86083 | -1.12615 | BACE2                   |
| 232442 at    | -2.03501 | -1.02503     | 2.035007       | down       | -2.16185 | -1.11226     | 2.161847       | down       | 0         | -1.02503 | -1.11226 | BCAR1                   |
| 230722 at    | -1.55148 | -0.63364     | 1.55148        | down       | -1.62354 | -0.69914     | 1.623539       | down       | 0         | -0.63364 | -0.69914 | BNC2                    |
| 224471 s at  | -1.52005 | -0.60412     | 1.520053       | down       | -1.75742 | -0.81346     | 1.75742        | down       | 0         | -0.60412 | -0.81346 | BTRC                    |
| 237245 at    | -2.08478 | -1.0599      | 2.084781       | down       | -1.86744 | -0.90106     | 1.86744        | down       | 0         | -1.0599  | -0.90106 | BUB3                    |
| 209183 s at  | -2.24911 | -1.16936     | 2.249115       | down       | -2.99616 | -1.58312     | 2.996161       | down       | 0         | -1.16936 | -1.58312 | C10orf10                |
| 65472 at     | -1.80608 | -0.85286     | 1.806079       | down       | -1.66215 | -0.73305     | 1.662145       | down       | 0         | -0.85286 | -0.73305 | C2orf68                 |
| 224605 at    | -1.75364 | -0.81035     | 1.753639       | down       | -2.13956 | -1.09731     | 2.139556       | down       | 0         | -0.81035 | -1.09731 | C4orf3                  |
| 224875 at    | -1.51455 | -0.59889     | 1.514551       | down       | -1.96219 | -0.97246     | 1.962186       | down       | 0         | -0.59889 | -0.97246 | C5orf24                 |
| 205199 at    | -1.92592 | -0.94554     | 1.925915       | down       | -2.39351 | -1.25913     | 2.393508       | down       | 0         | -0.94554 | -1.25913 | CA9                     |

|         |      |          |          |          |      |          |          |          |      |   |          |          |           |
|---------|------|----------|----------|----------|------|----------|----------|----------|------|---|----------|----------|-----------|
| 64408   | s at | -1.77359 | -0.82667 | 1.773588 | down | -1.76563 | -0.82019 | 1.765635 | down | 0 | -0.82667 | -0.82019 | CALML4    |
| 1568600 | at   | -1.90276 | -0.92809 | 1.902758 | down | -1.94166 | -0.95729 | 1.941658 | down | 0 | -0.92809 | -0.95729 | CALML4    |
| 229549  | at   | -2.19972 | -1.13732 | 2.199722 | down | -1.6623  | -0.73318 | 1.662296 | down | 0 | -1.13732 | -0.73318 | CALU      |
| 226382  | at   | -1.53649 | -0.61964 | 1.53649  | down | -1.54427 | -0.62692 | 1.544269 | down | 0 | -0.61964 | -0.62692 | CAMK1D    |
| 1552701 | a at | -1.51258 | -0.59701 | 1.512576 | down | -2.60954 | -1.3838  | 2.609542 | down | 0 | -0.59701 | -1.3838  | CARD16    |
| 207006  | s at | -1.51848 | -0.60263 | 1.518483 | down | -1.51848 | -0.60263 | 1.518483 | down | 0 | -0.60263 | -0.60263 | CCDC106   |
| 228081  | at   | -1.52475 | -0.60857 | 1.524749 | down | -1.52475 | -0.60857 | 1.524749 | down | 0 | -0.60857 | -0.60857 | CCNG2     |
| 217523  | at   | -1.54317 | -0.62589 | 1.543165 | down | -1.73188 | -0.79234 | 1.731885 | down | 0 | -0.62589 | -0.79234 | CD44      |
| 201005  | at   | -1.69321 | -0.75976 | 1.693208 | down | -1.71919 | -0.78172 | 1.719185 | down | 0 | -0.75976 | -0.78172 | CD9       |
| 209112  | at   | -1.51395 | -0.59832 | 1.513955 | down | -1.66823 | -0.73832 | 1.668228 | down | 0 | -0.59832 | -0.73832 | CDKN1B    |
| 209172  | s at | -1.55736 | -0.6391  | 1.557358 | down | -1.51664 | -0.60088 | 1.516642 | down | 0 | -0.6391  | -0.60088 | CENPF     |
| 222848  | at   | -1.60512 | -0.68268 | 1.60512  | down | -1.55081 | -0.63302 | 1.550808 | down | 0 | -0.68268 | -0.63302 | CENPK     |
| 239322  | at   | -1.7774  | -0.82977 | 1.777399 | down | -1.72186 | -0.78397 | 1.72186  | down | 0 | -0.82977 | -0.78397 | CEP41     |
| 209763  | at   | -2.10335 | -1.07269 | 2.103347 | down | -1.99245 | -0.99454 | 1.992447 | down | 0 | -1.07269 | -0.99454 | CHRDL1    |
| 226686  | at   | -1.6075  | -0.68482 | 1.607497 | down | -1.8038  | -0.85104 | 1.803801 | down | 0 | -0.68482 | -0.85104 | CISD2     |
| 241696  | at   | -1.54326 | -0.62598 | 1.543261 | down | -1.91026 | -0.93377 | 1.91026  | down | 0 | -0.62598 | -0.93377 | CNTLN     |
| 206497  | at   | -1.90286 | -0.92817 | 1.902863 | down | -2.1221  | -1.08549 | 2.122095 | down | 0 | -0.92817 | -1.08549 | COA1      |
| 202311  | s at | -2.23578 | -1.16078 | 2.235778 | down | -2.46612 | -1.30224 | 2.466123 | down | 0 | -1.16078 | -1.30224 | COL1A1    |
| 213846  | at   | -1.50822 | -0.59284 | 1.508216 | down | -1.64134 | -0.71488 | 1.641344 | down | 0 | -0.59284 | -0.71488 | COX7C     |
| 205832  | at   | -2.01715 | -1.01232 | 2.017152 | down | -2.66247 | -1.41276 | 2.662467 | down | 0 | -1.01232 | -1.41276 | CPA4      |
| 217564  | s at | -2.12998 | -1.09084 | 2.129979 | down | -1.81051 | -0.8564  | 1.810514 | down | 0 | -1.09084 | -0.8564  | CPS1      |
| 238914  | at   | -1.59251 | -0.67131 | 1.592514 | down | -2.1329  | -1.09281 | 2.132897 | down | 0 | -0.67131 | -1.09281 | DCC       |
| 212690  | at   | -1.68118 | -0.74947 | 1.681179 | down | -1.54926 | -0.63158 | 1.549261 | down | 0 | -0.74947 | -0.63158 | DDHD2     |
| 218362  | s at | -1.52091 | -0.60493 | 1.520906 | down | -1.5917  | -0.67057 | 1.591704 | down | 0 | -0.60493 | -0.67057 | DIS3      |
| 1556821 | x at | -1.56404 | -0.64528 | 1.564041 | down | -1.56404 | -0.64528 | 1.564041 | down | 0 | -0.64528 | -0.64528 | DLEU2     |
| 229588  | at   | -1.5482  | -0.63059 | 1.548195 | down | -1.78135 | -0.83297 | 1.781351 | down | 0 | -0.63059 | -0.83297 | DNAJC10   |
| 201843  | s at | -2.1422  | -1.09909 | 2.142202 | down | -2.33589 | -1.22397 | 2.335889 | down | 0 | -1.09909 | -1.22397 | EFEMP1    |
| 230479  | at   | -1.77526 | -0.82803 | 1.775256 | down | -1.77526 | -0.82803 | 1.775256 | down | 0 | -0.82803 | -0.82803 | EIF3F     |
| 213570  | at   | -1.51162 | -0.5961  | 1.511624 | down | -1.8415  | -0.88088 | 1.841496 | down | 0 | -0.5961  | -0.88088 | EIF4E2    |
| 230178  | s at | -1.51473 | -0.59906 | 1.514727 | down | -1.68711 | -0.75456 | 1.687113 | down | 0 | -0.59906 | -0.75456 | ELP2      |
| 1569349 | at   | -1.50418 | -0.58898 | 1.504184 | down | -1.50418 | -0.58898 | 1.504184 | down | 0 | -0.58898 | -0.58898 | EMSY      |
| 204161  | s at | -1.56496 | -0.64613 | 1.564963 | down | -1.73161 | -0.79211 | 1.731609 | down | 0 | -0.64613 | -0.79211 | ENPP4     |
| 227803  | at   | -1.67406 | -0.74335 | 1.674056 | down | -2.01872 | -1.01344 | 2.018717 | down | 0 | -0.74335 | -1.01344 | ENPP5     |
| 237054  | at   | -1.89966 | -0.92574 | 1.899658 | down | -2.35141 | -1.23353 | 2.35141  | down | 0 | -0.92574 | -1.23353 | ENPP5     |
| 1562921 | at   | -1.51634 | -0.60059 | 1.516339 | down | -1.58213 | -0.66187 | 1.58213  | down | 0 | -0.60059 | -0.66187 | EP300-AS1 |
| 206070  | s at | -1.94139 | -0.95709 | 1.941392 | down | -2.05777 | -1.04108 | 2.057766 | down | 0 | -0.95709 | -1.04108 | EPHA3     |
| 231926  | at   | -1.50646 | -0.59116 | 1.506455 | down | -1.67816 | -0.74688 | 1.678165 | down | 0 | -0.59116 | -0.74688 | EPS15L1   |
| 226418  | at   | -1.55412 | -0.6361  | 1.554117 | down | -1.55412 | -0.6361  | 1.554117 | down | 0 | -0.6361  | -0.6361  | ERGIC2    |
| 224698  | at   | -1.54027 | -0.62319 | 1.540274 | down | -1.54027 | -0.62319 | 1.540274 | down | 0 | -0.62319 | -0.62319 | ESYT2     |
| 203989  | x at | -1.55083 | -0.63304 | 1.550832 | down | -1.96302 | -0.97308 | 1.963023 | down | 0 | -0.63304 | -0.97308 | F2R       |
| 213506  | at   | -1.50939 | -0.59397 | 1.509393 | down | -1.82997 | -0.87182 | 1.829974 | down | 0 | -0.59397 | -0.87182 | F2RL1     |
| 230147  | at   | -1.55788 | -0.63958 | 1.557879 | down | -1.58145 | -0.66125 | 1.581449 | down | 0 | -0.63958 | -0.66125 | F2RL2     |
| 228441  | s at | -1.5367  | -0.61984 | 1.536704 | down | -1.82661 | -0.86917 | 1.826606 | down | 0 | -0.61984 | -0.86917 | FAM160A1  |
| 235850  | at   | -1.7047  | -0.76951 | 1.704696 | down | -1.75146 | -0.80856 | 1.751461 | down | 0 | -0.76951 | -0.80856 | FAM162A   |

|         |      |          |          |          |      |          |          |          |      |   |          |          |                        |
|---------|------|----------|----------|----------|------|----------|----------|----------|------|---|----------|----------|------------------------|
| 36612   | at   | -2.01993 | -1.0143  | 2.019928 | down | -2.43153 | -1.28186 | 2.431527 | down | 0 | -1.0143  | -1.28186 | FAM168A                |
| 224973  | at   | -1.50936 | -0.59394 | 1.509359 | down | -1.64288 | -0.71623 | 1.642879 | down | 0 | -0.59394 | -0.71623 | FAM46A                 |
| 226811  | at   | -1.73645 | -0.79614 | 1.736448 | down | -1.92451 | -0.94449 | 1.924513 | down | 0 | -0.79614 | -0.94449 | FAM46C                 |
| 228987  | at   | -1.91419 | -0.93673 | 1.914188 | down | -1.57191 | -0.65251 | 1.571906 | down | 0 | -0.93673 | -0.65251 | FAM49B                 |
| 226062  | x at | -1.51958 | -0.60367 | 1.519581 | down | -1.64349 | -0.71676 | 1.643487 | down | 0 | -0.60367 | -0.71676 | FAM63A                 |
| 235125  | x at | -1.52991 | -0.61345 | 1.529914 | down | -1.70903 | -0.77318 | 1.70903  | down | 0 | -0.61345 | -0.77318 | FAM73A                 |
| 235318  | at   | -1.66302 | -0.7338  | 1.663017 | down | -2.05731 | -1.04076 | 2.057312 | down | 0 | -0.7338  | -1.04076 | FBN1                   |
| 221123  | x at | -1.50359 | -0.58842 | 1.503595 | down | -1.56494 | -0.64611 | 1.56494  | down | 0 | -0.58842 | -0.64611 | FBXO16///ZNF395        |
| 232693  | s at | -1.58804 | -0.66725 | 1.588044 | down | -1.68266 | -0.75075 | 1.682664 | down | 0 | -0.66725 | -0.75075 | FBXO16///ZNF395        |
| 1559096 | x at | -1.59847 | -0.67669 | 1.598469 | down | -1.70845 | -0.77268 | 1.708446 | down | 0 | -0.67669 | -0.77268 | FBXO9                  |
| 235311  | at   | -1.58872 | -0.66787 | 1.588721 | down | -1.86201 | -0.89686 | 1.862009 | down | 0 | -0.66787 | -0.89686 | FKBP14                 |
| 223667  | at   | -1.83911 | -0.87901 | 1.839108 | down | -2.22977 | -1.15689 | 2.229767 | down | 0 | -0.87901 | -1.15689 | FKBP7                  |
| 1558199 | at   | -1.55128 | -0.63346 | 1.551283 | down | -1.75359 | -0.81031 | 1.753585 | down | 0 | -0.63346 | -0.81031 | FN1                    |
| 207653  | at   | -1.55375 | -0.63575 | 1.55375  | down | -1.55375 | -0.63575 | 1.55375  | down | 0 | -0.63575 | -0.63575 | FOXD2                  |
| 243409  | at   | -1.64522 | -0.71828 | 1.645221 | down | -1.77892 | -0.831   | 1.778921 | down | 0 | -0.71828 | -0.831   | FOXL1                  |
| 235535  | x at | -1.57515 | -0.65549 | 1.575148 | down | -1.57515 | -0.65549 | 1.575148 | down | 0 | -0.65549 | -0.65549 | FRG1///FRG1BP///FRG1CP |
| 230904  | at   | -1.67839 | -0.74708 | 1.678395 | down | -1.61946 | -0.69551 | 1.619456 | down | 0 | -0.74708 | -0.69551 | FSD1L                  |
| 236035  | at   | -1.66701 | -0.73727 | 1.667014 | down | -1.66701 | -0.73727 | 1.667014 | down | 0 | -0.73727 | -0.73727 | FZD1                   |
| 204875  | s at | -1.50886 | -0.59346 | 1.508859 | down | -1.59322 | -0.67195 | 1.593223 | down | 0 | -0.59346 | -0.67195 | GMDS                   |
| 242404  | at   | -1.82244 | -0.86587 | 1.822444 | down | -1.82244 | -0.86587 | 1.822444 | down | 0 | -0.86587 | -0.86587 | GNB5                   |
| 213212  | x at | -1.51211 | -0.59656 | 1.512106 | down | -1.61944 | -0.6955  | 1.61944  | down | 0 | -0.59656 | -0.6955  | GOLGA6L4///GOLGA6L5P   |
| 243880  | at   | -1.76339 | -0.81835 | 1.763387 | down | -1.68459 | -0.7524  | 1.684589 | down | 0 | -0.81835 | -0.7524  | GOSR2                  |
| 219313  | at   | -1.9285  | -0.94748 | 1.9285   | down | -1.66701 | -0.73727 | 1.667014 | down | 0 | -0.94748 | -0.73727 | GRAMD1C                |
| 240452  | at   | -1.5936  | -0.67229 | 1.593603 | down | -1.54683 | -0.62931 | 1.546826 | down | 0 | -0.67229 | -0.62931 | GSPT1                  |
| 215599  | at   | -1.93964 | -0.95579 | 1.939636 | down | -1.96419 | -0.97393 | 1.964188 | down | 0 | -0.95579 | -0.97393 | GUSBP3                 |
| 213054  | at   | -1.84358 | -0.88251 | 1.843582 | down | -1.5177  | -0.60189 | 1.517699 | down | 0 | -0.88251 | -0.60189 | HAUS5                  |
| 227350  | at   | -1.86416 | -0.89852 | 1.864159 | down | -1.71598 | -0.77903 | 1.715982 | down | 0 | -0.89852 | -0.77903 | HELLS                  |
| 208576  | s at | -2.06254 | -1.04442 | 2.062541 | down | -1.8115  | -0.85719 | 1.811504 | down | 0 | -1.04442 | -0.85719 | HIST1H3B               |
| 238900  | at   | -1.5622  | -0.64358 | 1.562196 | down | -1.59561 | -0.67411 | 1.595607 | down | 0 | -0.64358 | -0.67411 | HLA-DRB1///HLA-DRB3    |
| 225786  | at   | -1.8609  | -0.896   | 1.860901 | down | -1.58739 | -0.66666 | 1.587394 | down | 0 | -0.896   | -0.66666 | HNRNPU                 |
| 235603  | at   | -1.61642 | -0.69281 | 1.616424 | down | -1.80151 | -0.8492  | 1.801507 | down | 0 | -0.69281 | -0.8492  | HNRNPU                 |
| 244442  | at   | -1.52018 | -0.60424 | 1.520178 | down | -1.51367 | -0.59805 | 1.513666 | down | 0 | -0.60424 | -0.59805 | HORMAD2                |
| 230031  | at   | -1.63297 | -0.7075  | 1.632967 | down | -1.73712 | -0.7967  | 1.737121 | down | 0 | -0.7075  | -0.7967  | HSPA5                  |
| 242639  | at   | -1.99369 | -0.99544 | 1.993693 | down | -1.65001 | -0.72248 | 1.650014 | down | 0 | -0.99544 | -0.72248 | ICE2                   |
| 213931  | at   | -1.67725 | -0.7461  | 1.677254 | down | -1.80022 | -0.84818 | 1.800224 | down | 0 | -0.7461  | -0.84818 | ID2///ID2B             |
| 236823  | at   | -1.88591 | -0.91526 | 1.885907 | down | -1.88591 | -0.91526 | 1.885907 | down | 0 | -0.91526 | -0.91526 | IDS                    |
| 204415  | at   | -2.11077 | -1.07777 | 2.11077  | down | -2.131   | -1.09153 | 2.130995 | down | 0 | -1.07777 | -1.09153 | IFI6                   |
| 210095  | s at | -1.56667 | -0.6477  | 1.566667 | down | -1.57268 | -0.65323 | 1.572684 | down | 0 | -0.6477  | -0.65323 | IGFBP3                 |
| 212143  | s at | -1.89378 | -0.92127 | 1.893781 | down | -2.01906 | -1.01368 | 2.019058 | down | 0 | -0.92127 | -1.01368 | IGFBP3                 |
| 1562848 | at   | -1.67652 | -0.74547 | 1.676522 | down | -1.63096 | -0.70572 | 1.63096  | down | 0 | -0.74547 | -0.70572 | IST1                   |
| 201474  | s at | -1.527   | -0.6107  | 1.527004 | down | -1.57061 | -0.65133 | 1.570612 | down | 0 | -0.6107  | -0.65133 | ITGA3                  |
| 205885  | s at | -1.88473 | -0.91436 | 1.884727 | down | -1.61644 | -0.69282 | 1.616439 | down | 0 | -0.91436 | -0.69282 | ITGA4                  |
| 213416  | at   | -1.67503 | -0.74419 | 1.675032 | down | -2.24266 | -1.16521 | 2.242657 | down | 0 | -0.74419 | -1.16521 | ITGA4                  |
| 223412  | at   | -1.60812 | -0.68538 | 1.608122 | down | -2.11021 | -1.07739 | 2.110213 | down | 0 | -0.68538 | -1.07739 | KBTBD7                 |

|         |      |          |          |          |      |          |          |          |      |   |          |          |                  |
|---------|------|----------|----------|----------|------|----------|----------|----------|------|---|----------|----------|------------------|
| 229298  | at   | -1.81926 | -0.86335 | 1.819257 | down | -1.81926 | -0.86335 | 1.819257 | down | 0 | -0.86335 | -0.86335 | KBTBD7           |
| 229970  | at   | -1.59508 | -0.67363 | 1.595078 | down | -1.59508 | -0.67363 | 1.595078 | down | 0 | -0.67363 | -0.67363 | KBTBD7           |
| 229850  | at   | -1.60044 | -0.67847 | 1.60044  | down | -1.82283 | -0.86618 | 1.82283  | down | 0 | -0.67847 | -0.86618 | KDSR             |
| 238659  | at   | -2.06618 | -1.04697 | 2.066182 | down | -1.95786 | -0.96928 | 1.957858 | down | 0 | -1.04697 | -0.96928 | KIAA0141         |
| 213316  | at   | -1.63321 | -0.70771 | 1.633206 | down | -1.80131 | -0.84904 | 1.801306 | down | 0 | -0.70771 | -0.84904 | KIAA1462         |
| 236887  | at   | -1.71683 | -0.77975 | 1.716832 | down | -1.62269 | -0.69839 | 1.622688 | down | 0 | -0.77975 | -0.69839 | KIN              |
| 226158  | at   | -1.67251 | -0.74201 | 1.67251  | down | -1.83306 | -0.87426 | 1.833063 | down | 0 | -0.74201 | -0.87426 | KLHL24           |
| 201795  | at   | -1.6681  | -0.7382  | 1.668097 | down | -1.76147 | -0.81678 | 1.761467 | down | 0 | -0.7382  | -0.81678 | LBR              |
| 225571  | at   | -1.80146 | -0.84917 | 1.801462 | down | -1.69723 | -0.76318 | 1.697226 | down | 0 | -0.84917 | -0.76318 | LJFR             |
| 222456  | s at | -1.75957 | -0.81522 | 1.759568 | down | -1.85216 | -0.88921 | 1.852157 | down | 0 | -0.81522 | -0.88921 | LJMA1            |
| 213703  | at   | -2.18387 | -1.12688 | 2.183866 | down | -2.45683 | -1.2968  | 2.456833 | down | 0 | -1.12688 | -1.2968  | LINC00342        |
| 204249  | s at | -2.187   | -1.12896 | 2.187005 | down | -2.1903  | -1.13113 | 2.190304 | down | 0 | -1.12896 | -1.13113 | LMO2             |
| 235060  | at   | -1.58035 | -0.66024 | 1.580347 | down | -1.82953 | -0.87148 | 1.829533 | down | 0 | -0.66024 | -0.87148 | LOC100190986     |
| 240467  | at   | -1.54592 | -0.62847 | 1.545925 | down | -1.66044 | -0.73156 | 1.660438 | down | 0 | -0.62847 | -0.73156 | LOC105373341     |
| 235151  | at   | -1.63886 | -0.71269 | 1.63886  | down | -1.98069 | -0.986   | 1.980692 | down | 0 | -0.71269 | -0.986   | LOC283357        |
| 229007  | at   | -1.65436 | -0.72627 | 1.654357 | down | -1.82856 | -0.87071 | 1.82856  | down | 0 | -0.72627 | -0.87071 | LOC283788        |
| 231478  | at   | -1.5234  | -0.6073  | 1.523404 | down | -1.5234  | -0.6073  | 1.523404 | down | 0 | -0.6073  | -0.6073  | LOC729966//PDE4C |
| 1561180 | at   | -1.69667 | -0.76271 | 1.696673 | down | -1.75906 | -0.8148  | 1.759055 | down | 0 | -0.76271 | -0.8148  | LRP11            |
| 231840  | x at | -1.50211 | -0.58699 | 1.502114 | down | -1.61823 | -0.69442 | 1.618229 | down | 0 | -0.58699 | -0.69442 | LYRM7            |
| 221261  | x at | -1.57791 | -0.65801 | 1.577908 | down | -1.52804 | -0.61168 | 1.528036 | down | 0 | -0.65801 | -0.61168 | MAGED4//MAGED4B  |
| 223313  | s at | -1.6238  | -0.69937 | 1.623796 | down | -1.67247 | -0.74198 | 1.672471 | down | 0 | -0.69937 | -0.74198 | MAGED4//MAGED4B  |
| 228925  | at   | -1.61323 | -0.68995 | 1.613227 | down | -1.56315 | -0.64445 | 1.563147 | down | 0 | -0.68995 | -0.64445 | MAPKAPK5         |
| 1553759 | at   | -1.5341  | -0.61739 | 1.534097 | down | -1.68956 | -0.75665 | 1.689558 | down | 0 | -0.61739 | -0.75665 | MCM9             |
| 202611  | s at | -1.6127  | -0.68948 | 1.612703 | down | -1.73736 | -0.7969  | 1.737364 | down | 0 | -0.68948 | -0.7969  | MED14            |
| 202016  | at   | -1.52778 | -0.61143 | 1.527778 | down | -2.11178 | -1.07846 | 2.11178  | down | 0 | -0.61143 | -1.07846 | MEST             |
| 236480  | at   | -2.03393 | -1.02427 | 2.033932 | down | -2.39152 | -1.25793 | 2.391519 | down | 0 | -1.02427 | -1.25793 | MIR210HG         |
| 229734  | at   | -1.5057  | -0.59043 | 1.505696 | down | -1.69517 | -0.76143 | 1.695167 | down | 0 | -0.59043 | -0.76143 | MIR4697HG        |
| 232071  | at   | -1.6505  | -0.7229  | 1.650496 | down | -1.68134 | -0.74961 | 1.681341 | down | 0 | -0.7229  | -0.74961 | MRPL19           |
| 242289  | at   | -1.64295 | -0.71628 | 1.642946 | down | -1.64295 | -0.71628 | 1.642946 | down | 0 | -0.71628 | -0.71628 | MRPL42           |
| 209146  | at   | -1.52642 | -0.61015 | 1.52642  | down | -1.54412 | -0.62678 | 1.544117 | down | 0 | -0.61015 | -0.62678 | MSMO1            |
| 212338  | at   | -1.58488 | -0.66437 | 1.584876 | down | -1.52562 | -0.60939 | 1.525615 | down | 0 | -0.66437 | -0.60939 | MYO1D            |
| 221899  | at   | -1.50871 | -0.59331 | 1.508709 | down | -1.59752 | -0.67583 | 1.597518 | down | 0 | -0.59331 | -0.67583 | N4BP2L2          |
| 201774  | s at | -1.61844 | -0.6946  | 1.618436 | down | -1.79683 | -0.84545 | 1.796828 | down | 0 | -0.6946  | -0.84545 | NCAPD2           |
| 200632  | s at | -1.61889 | -0.69501 | 1.618892 | down | -1.76478 | -0.81949 | 1.76478  | down | 0 | -0.69501 | -0.81949 | NDRG1            |
| 229235  | at   | -1.53124 | -0.6147  | 1.531243 | down | -1.55779 | -0.6395  | 1.55779  | down | 0 | -0.6147  | -0.6395  | NFATC2IP         |
| 213032  | at   | -1.65799 | -0.72943 | 1.657989 | down | -1.85143 | -0.88864 | 1.851431 | down | 0 | -0.72943 | -0.88864 | NFIB             |
| 235432  | at   | -1.50858 | -0.59319 | 1.508581 | down | -1.86312 | -0.89772 | 1.863115 | down | 0 | -0.59319 | -0.89772 | NPHP3            |
| 215921  | at   | -1.5982  | -0.67645 | 1.598203 | down | -1.52444 | -0.60828 | 1.524439 | down | 0 | -0.67645 | -0.60828 | NPIP11//NPIP3    |
| 229956  | at   | -1.56984 | -0.65062 | 1.569839 | down | -1.57359 | -0.65406 | 1.573586 | down | 0 | -0.65062 | -0.65406 | NR2C1            |
| 209505  | at   | -1.86139 | -0.89638 | 1.861385 | down | -2.03769 | -1.02693 | 2.03769  | down | 0 | -0.89638 | -1.02693 | NR2F1            |
| 241962  | at   | -1.73341 | -0.79362 | 1.733415 | down | -1.99117 | -0.99361 | 1.991166 | down | 0 | -0.79362 | -0.99361 | NT5DC1           |
| 1569030 | s at | -1.55135 | -0.63352 | 1.551351 | down | -1.58611 | -0.66549 | 1.586108 | down | 0 | -0.63352 | -0.66549 | NUB1             |
| 225438  | at   | -1.51622 | -0.60048 | 1.516225 | down | -1.61073 | -0.68771 | 1.61073  | down | 0 | -0.60048 | -0.68771 | NUDCD1           |
| 213075  | at   | -1.64399 | -0.7172  | 1.643988 | down | -1.67801 | -0.74675 | 1.678008 | down | 0 | -0.7172  | -0.74675 | OLFML2A          |

|         |      |          |          |          |      |          |          |          |      |   |          |          |                           |
|---------|------|----------|----------|----------|------|----------|----------|----------|------|---|----------|----------|---------------------------|
| 200816  | s at | -1.50204 | -0.58693 | 1.502043 | down | -1.54056 | -0.62345 | 1.540559 | down | 0 | -0.58693 | -0.62345 | PFAFH1B1                  |
| 230100  | x at | -1.5616  | -0.64302 | 1.561598 | down | -1.50209 | -0.58697 | 1.502085 | down | 0 | -0.64302 | -0.58697 | PAK1                      |
| 224212  | s at | -1.52871 | -0.61231 | 1.528708 | down | -1.52871 | -0.61231 | 1.528708 | down | 0 | -0.61231 | -0.61231 | PCDHA1///PCDHA10///PCDHA1 |
| 231726  | at   | -1.50769 | -0.59234 | 1.507693 | down | -1.74787 | -0.80559 | 1.747866 | down | 0 | -0.59234 | -0.80559 | PCDHB14                   |
| 232099  | at   | -1.5041  | -0.5889  | 1.504098 | down | -1.76894 | -0.82289 | 1.768942 | down | 0 | -0.5889  | -0.82289 | PCDHB16                   |
| 228905  | at   | -1.70272 | -0.76784 | 1.70272  | down | -1.70887 | -0.77304 | 1.708868 | down | 0 | -0.76784 | -0.77304 | PCM1                      |
| 226119  | at   | -1.69442 | -0.7608  | 1.694424 | down | -1.58565 | -0.66507 | 1.585647 | down | 0 | -0.7608  | -0.66507 | PCMTD1                    |
| 232521  | at   | -1.57115 | -0.65182 | 1.571154 | down | -1.57115 | -0.65182 | 1.571154 | down | 0 | -0.65182 | -0.65182 | PCSK7                     |
| 229453  | at   | -1.60715 | -0.68451 | 1.607154 | down | -1.96805 | -0.97677 | 1.968049 | down | 0 | -0.68451 | -0.97677 | PDIA3                     |
| 226452  | at   | -1.5594  | -0.64099 | 1.559401 | down | -1.92952 | -0.94824 | 1.929519 | down | 0 | -0.64099 | -0.94824 | PDK1                      |
| 228499  | at   | -1.80495 | -0.85196 | 1.804949 | down | -1.9545  | -0.9668  | 1.954498 | down | 0 | -0.85196 | -0.9668  | PFKFB4                    |
| 1558365 | at   | -2.13061 | -1.09127 | 2.130613 | down | -2.42954 | -1.28069 | 2.429544 | down | 0 | -1.09127 | -1.28069 | PGK1                      |
| 229705  | at   | -1.57392 | -0.65436 | 1.573923 | down | -1.99718 | -0.99797 | 1.997183 | down | 0 | -0.65436 | -0.99797 | PIK3C3                    |
| 239300  | at   | -1.57663 | -0.65685 | 1.576631 | down | -1.60698 | -0.68435 | 1.606979 | down | 0 | -0.65685 | -0.68435 | PIK3C3                    |
| 213700  | s at | -1.50055 | -0.58549 | 1.500547 | down | -1.50055 | -0.58549 | 1.500547 | down | 0 | -0.58549 | -0.58549 | PKM                       |
| 238992  | at   | -1.50264 | -0.5875  | 1.502643 | down | -1.64078 | -0.71438 | 1.640778 | down | 0 | -0.5875  | -0.71438 | POLI                      |
| 214978  | s at | -1.51806 | -0.60223 | 1.518058 | down | -1.86112 | -0.89617 | 1.861122 | down | 0 | -0.60223 | -0.89617 | PPFIA4                    |
| 203407  | at   | -2.25697 | -1.17439 | 2.256974 | down | -3.29695 | -1.72113 | 3.296954 | down | 0 | -1.17439 | -1.72113 | PPL                       |
| 201407  | s at | -1.54794 | -0.63035 | 1.547939 | down | -1.71707 | -0.77995 | 1.717074 | down | 0 | -0.63035 | -0.77995 | PPP1CB                    |
| 201408  | at   | -1.68433 | -0.75218 | 1.684333 | down | -2.08821 | -1.06227 | 2.088212 | down | 0 | -0.75218 | -1.06227 | PPP1CB                    |
| 214917  | at   | -1.75382 | -0.8105  | 1.753822 | down | -1.76093 | -0.81633 | 1.760926 | down | 0 | -0.8105  | -0.81633 | PRKAA1                    |
| 225984  | at   | -1.65289 | -0.72499 | 1.652893 | down | -1.52356 | -0.60745 | 1.523563 | down | 0 | -0.72499 | -0.60745 | PRKAA1                    |
| 238441  | at   | -1.60667 | -0.68408 | 1.606672 | down | -1.62481 | -0.70027 | 1.624811 | down | 0 | -0.68408 | -0.70027 | PRKAA2                    |
| 219383  | at   | -1.89067 | -0.9189  | 1.890667 | down | -1.72073 | -0.78302 | 1.72073  | down | 0 | -0.9189  | -0.78302 | PRR5L                     |
| 241774  | at   | -2.34723 | -1.23096 | 2.347229 | down | -2.12761 | -1.08923 | 2.127607 | down | 0 | -1.23096 | -1.08923 | PSMA3-AS1                 |
| 227944  | at   | -1.52363 | -0.60751 | 1.52363  | down | -1.52896 | -0.61255 | 1.528962 | down | 0 | -0.60751 | -0.61255 | PTPN3                     |
| 225396  | at   | -1.5059  | -0.59063 | 1.505899 | down | -1.62214 | -0.6979  | 1.622138 | down | 0 | -0.59063 | -0.6979  | RBBP4                     |
| 228455  | at   | -1.91221 | -0.93524 | 1.912207 | down | -1.51497 | -0.59929 | 1.514969 | down | 0 | -0.93524 | -0.59929 | RBM15                     |
| 205158  | at   | -1.71345 | -0.77691 | 1.713455 | down | -1.63437 | -0.70873 | 1.634366 | down | 0 | -0.77691 | -0.70873 | RNASE4                    |
| 213397  | x at | -2.20659 | -1.14182 | 2.206586 | down | -2.41841 | -1.27406 | 2.418408 | down | 0 | -1.14182 | -1.27406 | RNASE4                    |
| 238949  | at   | -1.59512 | -0.67366 | 1.595118 | down | -1.74374 | -0.80218 | 1.743737 | down | 0 | -0.67366 | -0.80218 | RNF145                    |
| 1556062 | at   | -1.77622 | -0.82881 | 1.776222 | down | -1.81363 | -0.85888 | 1.813631 | down | 0 | -0.82881 | -0.85888 | RPP30                     |
| 209006  | s at | -1.70075 | -0.76617 | 1.700749 | down | -1.52504 | -0.60885 | 1.525044 | down | 0 | -0.76617 | -0.60885 | RSRP1                     |
| 219957  | at   | -1.5444  | -0.62704 | 1.544396 | down | -1.50646 | -0.59116 | 1.506455 | down | 0 | -0.62704 | -0.59116 | RUFY2                     |
| 219691  | at   | -1.59416 | -0.67279 | 1.594155 | down | -1.54881 | -0.63116 | 1.548812 | down | 0 | -0.67279 | -0.63116 | SAMD9                     |
| 234987  | at   | -1.6147  | -0.69126 | 1.614696 | down | -1.8903  | -0.91862 | 1.890302 | down | 0 | -0.69126 | -0.91862 | SAMHD1                    |
| 200832  | s at | -2.27369 | -1.18504 | 2.273692 | down | -2.24835 | -1.16886 | 2.248346 | down | 0 | -1.18504 | -1.16886 | SCD                       |
| 202375  | at   | -1.63039 | -0.70521 | 1.630387 | down | -1.57756 | -0.65769 | 1.577559 | down | 0 | -0.70521 | -0.65769 | SEC24D                    |
| 215641  | at   | -1.67374 | -0.74308 | 1.673744 | down | -2.1663  | -1.11523 | 2.1663   | down | 0 | -0.74308 | -1.11523 | SEC24D                    |
| 1552789 | at   | -1.54037 | -0.62327 | 1.540367 | down | -1.71354 | -0.77698 | 1.713542 | down | 0 | -0.62327 | -0.77698 | SEC62                     |
| 1552790 | a at | -1.50967 | -0.59423 | 1.509669 | down | -1.559   | -0.64062 | 1.559001 | down | 0 | -0.59423 | -0.64062 | SEC62                     |
| 235395  | at   | -1.53755 | -0.62063 | 1.537546 | down | -1.53755 | -0.62063 | 1.537546 | down | 0 | -0.62063 | -0.62063 | SEC63                     |
| 221768  | at   | -1.83077 | -0.87245 | 1.830769 | down | -2.0528  | -1.0376  | 2.052804 | down | 0 | -0.87245 | -1.0376  | SFPQ                      |
| 1553292 | s at | -2.0201  | -1.01443 | 2.020098 | down | -1.64295 | -0.71629 | 1.642946 | down | 0 | -1.01443 | -0.71629 | SGK494                    |

|         |      |          |          |          |      |          |          |          |      |   |          |          |          |
|---------|------|----------|----------|----------|------|----------|----------|----------|------|---|----------|----------|----------|
| 231938  | at   | -1.61889 | -0.69501 | 1.618892 | down | -1.61889 | -0.69501 | 1.618892 | down | 0 | -0.69501 | -0.69501 | SGOL1    |
| 202856  | s at | -1.63076 | -0.70554 | 1.630759 | down | -1.90984 | -0.93346 | 1.909845 | down | 0 | -0.70554 | -0.93346 | SLC16A3  |
| 223698  | at   | -1.88805 | -0.91689 | 1.888045 | down | -1.56361 | -0.64488 | 1.563611 | down | 0 | -0.91689 | -0.64488 | SLC25A36 |
| 201250  | s at | -1.57217 | -0.65276 | 1.572169 | down | -1.80537 | -0.8523  | 1.805372 | down | 0 | -0.65276 | -0.8523  | SLC2A1   |
| 202498  | s at | -1.53214 | -0.61554 | 1.532136 | down | -1.7129  | -0.77644 | 1.712899 | down | 0 | -0.61554 | -0.77644 | SLC2A3   |
| 202499  | s at | -1.63066 | -0.70546 | 1.630661 | down | -2.01043 | -1.00751 | 2.010433 | down | 0 | -0.70546 | -1.00751 | SLC2A3   |
| 243166  | at   | -1.58099 | -0.66083 | 1.580987 | down | -1.78054 | -0.83231 | 1.780538 | down | 0 | -0.66083 | -0.83231 | SLC30A5  |
| 227620  | at   | -1.78587 | -0.83663 | 1.785874 | down | -2.07835 | -1.05544 | 2.07835  | down | 0 | -0.83663 | -1.05544 | SLC44A1  |
| 235725  | at   | -1.70804 | -0.77234 | 1.708037 | down | -1.70804 | -0.77234 | 1.708037 | down | 0 | -0.77234 | -0.77234 | SMAD4    |
| 1565703 | at   | -1.93867 | -0.95507 | 1.938674 | down | -1.59515 | -0.67369 | 1.595153 | down | 0 | -0.95507 | -0.67369 | SMAD4    |
| 236535  | at   | -1.66741 | -0.73761 | 1.667408 | down | -1.82397 | -0.86708 | 1.823969 | down | 0 | -0.73761 | -0.86708 | SMC6     |
| 212579  | at   | -1.58249 | -0.6622  | 1.582493 | down | -1.6499  | -0.72238 | 1.649897 | down | 0 | -0.6622  | -0.72238 | SMCHD1   |
| 212921  | at   | -1.86534 | -0.89944 | 1.865335 | down | -1.50646 | -0.59116 | 1.506455 | down | 0 | -0.89944 | -0.59116 | SMYD2    |
| 1556629 | a at | -1.73994 | -0.79904 | 1.739941 | down | -2.057   | -1.04054 | 2.056996 | down | 0 | -0.79904 | -1.04054 | SNAP25   |
| 222286  | at   | -1.83953 | -0.87934 | 1.839529 | down | -1.8331  | -0.87428 | 1.833098 | down | 0 | -0.87934 | -0.87428 | SNAPC3   |
| 229712  | at   | -2.03234 | -1.02315 | 2.032345 | down | -2.15605 | -1.10839 | 2.156048 | down | 0 | -1.02315 | -1.10839 | SNAPC3   |
| 242146  | at   | -1.60692 | -0.6843  | 1.606918 | down | -2.00405 | -1.00292 | 2.004053 | down | 0 | -0.6843  | -1.00292 | SNRPA1   |
| 213364  | s at | -1.57889 | -0.65892 | 1.578895 | down | -1.67045 | -0.74024 | 1.670454 | down | 0 | -0.65892 | -0.74024 | SNX1     |
| 232049  | at   | -1.89201 | -0.91992 | 1.892014 | down | -1.86118 | -0.89621 | 1.861176 | down | 0 | -0.91992 | -0.89621 | SNX2     |
| 207711  | at   | -1.68215 | -0.7503  | 1.682146 | down | -1.81337 | -0.85867 | 1.813372 | down | 0 | -0.7503  | -0.85867 | SOGA1    |
| 229075  | at   | -1.50597 | -0.59069 | 1.50597  | down | -1.59087 | -0.66982 | 1.590871 | down | 0 | -0.59069 | -0.66982 | SPATA5   |
| 230885  | at   | -1.5999  | -0.67798 | 1.599898 | down | -1.63375 | -0.70818 | 1.633746 | down | 0 | -0.67798 | -0.70818 | SPG7     |
| 235611  | at   | -1.58484 | -0.66433 | 1.584837 | down | -1.61375 | -0.69041 | 1.613746 | down | 0 | -0.66433 | -0.69041 | SREK1    |
| 200685  | at   | -1.62067 | -0.69659 | 1.620668 | down | -1.68187 | -0.75006 | 1.681866 | down | 0 | -0.69659 | -0.75006 | SRSF11   |
| 213742  | at   | -1.7484  | -0.80604 | 1.7484   | down | -1.78543 | -0.83627 | 1.785431 | down | 0 | -0.80604 | -0.83627 | SRSF11   |
| 238483  | at   | -1.74642 | -0.8044  | 1.746424 | down | -2.26037 | -1.17656 | 2.260368 | down | 0 | -0.8044  | -1.17656 | SSBP2    |
| 238484  | s at | -1.55848 | -0.64014 | 1.55848  | down | -1.79687 | -0.84549 | 1.79687  | down | 0 | -0.64014 | -0.84549 | SSBP2    |
| 238861  | at   | -1.54749 | -0.62993 | 1.547491 | down | -1.65223 | -0.72442 | 1.652234 | down | 0 | -0.62993 | -0.72442 | SSBP2    |
| 1558604 | a at | -1.61142 | -0.68834 | 1.611424 | down | -1.69303 | -0.75961 | 1.693028 | down | 0 | -0.68834 | -0.75961 | SSBP2    |
| 225435  | at   | -1.60409 | -0.68175 | 1.60409  | down | -1.66709 | -0.73733 | 1.667088 | down | 0 | -0.68175 | -0.73733 | SSR1     |
| 226390  | at   | -1.772   | -0.82538 | 1.772    | down | -1.62564 | -0.70101 | 1.625639 | down | 0 | -0.82538 | -0.70101 | STARD4   |
| 229513  | at   | -1.55674 | -0.63853 | 1.556745 | down | -1.7011  | -0.76647 | 1.701098 | down | 0 | -0.63853 | -0.76647 | STRBP    |
| 215287  | at   | -1.5694  | -0.65021 | 1.569401 | down | -1.77161 | -0.82506 | 1.771613 | down | 0 | -0.65021 | -0.82506 | STRN     |
| 202761  | s at | -2.08828 | -1.06232 | 2.088283 | down | -1.73986 | -0.79897 | 1.739858 | down | 0 | -1.06232 | -0.79897 | SYNE2    |
| 228483  | s at | -1.84723 | -0.88536 | 1.847228 | down | -2.13436 | -1.0938  | 2.134358 | down | 0 | -0.88536 | -1.0938  | TAF9B    |
| 238067  | at   | -1.55667 | -0.63847 | 1.556674 | down | -1.85467 | -0.89117 | 1.854674 | down | 0 | -0.63847 | -0.89117 | TBC1D8B  |
| 235890  | at   | -1.63941 | -0.71318 | 1.63941  | down | -1.53798 | -0.62103 | 1.537976 | down | 0 | -0.71318 | -0.62103 | TBL1XR1  |
| 201449  | at   | -1.50456 | -0.58934 | 1.504556 | down | -1.98371 | -0.9882  | 1.98371  | down | 0 | -0.58934 | -0.9882  | TIA1     |
| 224560  | at   | -1.9816  | -0.98666 | 1.981597 | down | -2.23237 | -1.15858 | 2.23237  | down | 0 | -0.98666 | -1.15858 | TIMP2    |
| 201150  | s at | -2.31234 | -1.20935 | 2.312337 | down | -2.63954 | -1.40029 | 2.639539 | down | 0 | -1.20935 | -1.40029 | TIMP3    |
| 217974  | at   | -1.60913 | -0.68628 | 1.609133 | down | -1.61469 | -0.69126 | 1.614689 | down | 0 | -0.68628 | -0.69126 | TM7SF3   |
| 235798  | at   | -1.53789 | -0.62095 | 1.537887 | down | -1.7403  | -0.79934 | 1.740303 | down | 0 | -0.62095 | -0.79934 | TMEM170B |
| 228255  | at   | -1.63677 | -0.71086 | 1.636774 | down | -1.67263 | -0.74212 | 1.672631 | down | 0 | -0.71086 | -0.74212 | TMEM237  |
| 234980  | at   | -1.62791 | -0.70302 | 1.627913 | down | -1.56019 | -0.64172 | 1.560193 | down | 0 | -0.70302 | -0.64172 | TMEM56   |

|         |      |          |          |          |      |          |          |          |      |   |          |          |          |
|---------|------|----------|----------|----------|------|----------|----------|----------|------|---|----------|----------|----------|
| 237515  | at   | -2.01951 | -1.014   | 2.019506 | down | -1.50759 | -0.59225 | 1.507592 | down | 0 | -1.014   | -0.59225 | TMEM56   |
| 232023  | at   | -1.51801 | -0.60218 | 1.518005 | down | -1.62817 | -0.70325 | 1.628171 | down | 0 | -0.60218 | -0.70325 | TMEM67   |
| 237169  | at   | -1.73134 | -0.79189 | 1.731342 | down | -2.21179 | -1.14521 | 2.211785 | down | 0 | -0.79189 | -1.14521 | TNC      |
| 241858  | at   | -1.51403 | -0.59839 | 1.514029 | down | -1.75193 | -0.80895 | 1.751933 | down | 0 | -0.59839 | -0.80895 | TNNI3K   |
| 230779  | at   | -1.56556 | -0.64668 | 1.56556  | down | -1.88628 | -0.91554 | 1.886277 | down | 0 | -0.64668 | -0.91554 | TNRC6B   |
| 230241  | at   | -1.57285 | -0.65338 | 1.572846 | down | -1.77399 | -0.827   | 1.773992 | down | 0 | -0.65338 | -0.827   | TOR1AIP2 |
| 201691  | s at | -1.93721 | -0.95398 | 1.937206 | down | -1.80768 | -0.85414 | 1.807676 | down | 0 | -0.95398 | -0.85414 | TPD52    |
| 230211  | at   | -1.74956 | -0.80699 | 1.749557 | down | -1.6183  | -0.69448 | 1.618299 | down | 0 | -0.80699 | -0.69448 | TRIP11   |
| 235561  | at   | -2.54403 | -1.34711 | 2.544026 | down | -2.02943 | -1.02107 | 2.029428 | down | 0 | -1.34711 | -1.02107 | TXNL1    |
| 238868  | at   | -1.60692 | -0.6843  | 1.606917 | down | -2.31538 | -1.21125 | 2.315384 | down | 0 | -0.6843  | -1.21125 | UACA     |
| 1555560 | at   | -2.1536  | -1.10675 | 2.153603 | down | -2.36034 | -1.23899 | 2.360339 | down | 0 | -1.10675 | -1.23899 | UGGT2    |
| 229573  | at   | -1.74642 | -0.8044  | 1.746416 | down | -2.03769 | -1.02693 | 2.037686 | down | 0 | -0.8044  | -1.02693 | USP9X    |
| 213686  | at   | -1.61878 | -0.69491 | 1.618784 | down | -1.61232 | -0.68914 | 1.61232  | down | 0 | -0.69491 | -0.68914 | VPS13A   |
| 235625  | at   | -1.73055 | -0.79123 | 1.730551 | down | -2.22683 | -1.15499 | 2.226831 | down | 0 | -0.79123 | -1.15499 | VPS41    |
| 230267  | at   | -1.77877 | -0.83088 | 1.77877  | down | -2.11434 | -1.08021 | 2.114338 | down | 0 | -0.83088 | -1.08021 | WSB1     |
| 206698  | at   | -1.51151 | -0.59599 | 1.511512 | down | -1.69761 | -0.76351 | 1.69761  | down | 0 | -0.59599 | -0.76351 | XK       |
| 242443  | at   | -1.76256 | -0.81768 | 1.762565 | down | -1.60518 | -0.68273 | 1.605179 | down | 0 | -0.81768 | -0.68273 | ZC3H14   |
| 206169  | x at | -1.53072 | -0.61421 | 1.530725 | down | -1.9016  | -0.92721 | 1.901599 | down | 0 | -0.61421 | -0.92721 | ZC3H7B   |
| 212366  | at   | -1.5144  | -0.59874 | 1.514398 | down | -1.68336 | -0.75135 | 1.683363 | down | 0 | -0.59874 | -0.75135 | ZNF292   |
| 218149  | s at | -1.58914 | -0.66825 | 1.589144 | down | -1.74512 | -0.80333 | 1.74512  | down | 0 | -0.66825 | -0.80333 | ZNF395   |
| 219848  | s at | -1.58716 | -0.66645 | 1.587162 | down | -1.67298 | -0.74242 | 1.672977 | down | 0 | -0.66645 | -0.74242 | ZNF432   |
| 228630  | at   | -1.50008 | -0.58504 | 1.500079 | down | -1.50906 | -0.59365 | 1.509057 | down | 0 | -0.58504 | -0.59365 | ZNF84    |
| 237335  | at   | -1.56421 | -0.64544 | 1.564215 | down | -1.84351 | -0.88246 | 1.843512 | down | 0 | -0.64544 | -0.88246 | ZP1      |
| 209446  | s at | -1.80519 | -0.85215 | 1.80519  | down | -1.7824  | -0.83382 | 1.782399 | down | 0 | -0.85215 | -0.83382 |          |
| 213500  | at   | -1.61049 | -0.6875  | 1.610494 | down | -1.72554 | -0.78705 | 1.725539 | down | 0 | -0.6875  | -0.78705 |          |
| 213605  | s at | -2.10002 | -1.0704  | 2.100021 | down | -2.08878 | -1.06266 | 2.088777 | down | 0 | -1.0704  | -1.06266 |          |
| 216147  | at   | -1.55089 | -0.63309 | 1.550886 | down | -1.52349 | -0.60738 | 1.523489 | down | 0 | -0.63309 | -0.60738 |          |
| 217653  | x at | -1.54239 | -0.62517 | 1.542388 | down | -1.83336 | -0.87449 | 1.833363 | down | 0 | -0.62517 | -0.87449 |          |
| 31799   | at   | -1.83827 | -0.87835 | 1.838272 | down | -1.91175 | -0.9349  | 1.911752 | down | 0 | -0.87835 | -0.9349  |          |
| 223839  | s at | -1.81599 | -0.86075 | 1.815988 | down | -2.05217 | -1.03715 | 2.052173 | down | 0 | -0.86075 | -1.03715 |          |
| 227576  | at   | -1.6642  | -0.73483 | 1.664199 | down | -1.6642  | -0.73483 | 1.664199 | down | 0 | -0.73483 | -0.73483 |          |
| 227663  | at   | -1.55128 | -0.63346 | 1.551283 | down | -1.55128 | -0.63346 | 1.551283 | down | 0 | -0.63346 | -0.63346 |          |
| 229434  | at   | -1.95419 | -0.96657 | 1.954192 | down | -1.91228 | -0.93529 | 1.91228  | down | 0 | -0.96657 | -0.93529 |          |
| 229692  | at   | -1.54337 | -0.62608 | 1.543366 | down | -1.69563 | -0.76182 | 1.695633 | down | 0 | -0.62608 | -0.76182 |          |
| 229795  | at   | -1.51047 | -0.595   | 1.510469 | down | -1.51047 | -0.595   | 1.510469 | down | 0 | -0.595   | -0.595   |          |
| 230927  | at   | -1.60917 | -0.68632 | 1.60917  | down | -1.83853 | -0.87856 | 1.838535 | down | 0 | -0.68632 | -0.87856 |          |
| 231069  | at   | -1.71304 | -0.77656 | 1.713036 | down | -1.76599 | -0.82047 | 1.765985 | down | 0 | -0.77656 | -0.82047 |          |
| 231890  | at   | -1.72667 | -0.78799 | 1.726666 | down | -1.94056 | -0.95648 | 1.940565 | down | 0 | -0.78799 | -0.95648 |          |
| 231979  | at   | -1.50999 | -0.59454 | 1.509994 | down | -1.6446  | -0.71774 | 1.644605 | down | 0 | -0.59454 | -0.71774 |          |
| 232174  | at   | -2.20539 | -1.14103 | 2.205388 | down | -2.05271 | -1.03753 | 2.052707 | down | 0 | -1.14103 | -1.03753 |          |
| 232347  | x at | -1.61128 | -0.6882  | 1.611277 | down | -1.62219 | -0.69794 | 1.622187 | down | 0 | -0.6882  | -0.69794 |          |
| 232453  | at   | -1.81753 | -0.86198 | 1.817533 | down | -2.31336 | -1.20999 | 2.313365 | down | 0 | -0.86198 | -1.20999 |          |
| 232541  | at   | -2.30749 | -1.20632 | 2.307487 | down | -1.7754  | -0.82814 | 1.775396 | down | 0 | -1.20632 | -0.82814 |          |
| 232569  | at   | -1.52651 | -0.61023 | 1.526507 | down | -1.67221 | -0.74176 | 1.672214 | down | 0 | -0.61023 | -0.74176 |          |

|        |      |          |          |          |      |          |          |          |      |   |          |          |  |
|--------|------|----------|----------|----------|------|----------|----------|----------|------|---|----------|----------|--|
| 232600 | at   | -1.82652 | -0.8691  | 1.826524 | down | -2.30099 | -1.20225 | 2.300989 | down | 0 | -0.8691  | -1.20225 |  |
| 232889 | at   | -1.65001 | -0.72248 | 1.650012 | down | -1.97831 | -0.98427 | 1.97831  | down | 0 | -0.72248 | -0.98427 |  |
| 233090 | at   | -1.8893  | -0.91786 | 1.889305 | down | -1.72722 | -0.78845 | 1.72722  | down | 0 | -0.91786 | -0.78845 |  |
| 233364 | s at | -1.85848 | -0.89413 | 1.858484 | down | -2.0596  | -1.04237 | 2.059602 | down | 0 | -0.89413 | -1.04237 |  |
| 233388 | at   | -1.6792  | -0.74777 | 1.679196 | down | -1.6792  | -0.74777 | 1.679196 | down | 0 | -0.74777 | -0.74777 |  |
| 233518 | at   | -1.5447  | -0.62733 | 1.544701 | down | -1.5194  | -0.6035  | 1.5194   | down | 0 | -0.62733 | -0.6035  |  |
| 233607 | at   | -1.50949 | -0.59406 | 1.509493 | down | -1.50949 | -0.59406 | 1.509493 | down | 0 | -0.59406 | -0.59406 |  |
| 234997 | x at | -1.83704 | -0.87738 | 1.837038 | down | -1.8091  | -0.85527 | 1.809101 | down | 0 | -0.87738 | -0.85527 |  |
| 235028 | at   | -3.62515 | -1.85804 | 3.625148 | down | -2.64837 | -1.40511 | 2.648373 | down | 0 | -1.85804 | -1.40511 |  |
| 235159 | at   | -1.74716 | -0.80501 | 1.747162 | down | -1.99152 | -0.99387 | 1.991522 | down | 0 | -0.80501 | -0.99387 |  |
| 235286 | at   | -1.88015 | -0.91085 | 1.880152 | down | -1.85148 | -0.88868 | 1.851477 | down | 0 | -0.91085 | -0.88868 |  |
| 235419 | at   | -1.57454 | -0.65493 | 1.574541 | down | -2.01652 | -1.01187 | 2.016524 | down | 0 | -0.65493 | -1.01187 |  |
| 235513 | at   | -1.68459 | -0.7524  | 1.68459  | down | -1.70591 | -0.77054 | 1.705914 | down | 0 | -0.7524  | -0.77054 |  |
| 235581 | at   | -1.8284  | -0.87058 | 1.828404 | down | -1.81891 | -0.86307 | 1.818907 | down | 0 | -0.87058 | -0.86307 |  |
| 235629 | at   | -2.13412 | -1.09364 | 2.13412  | down | -3.20185 | -1.6789  | 3.201845 | down | 0 | -1.09364 | -1.6789  |  |
| 235693 | at   | -1.86034 | -0.89557 | 1.860344 | down | -1.51842 | -0.60257 | 1.518423 | down | 0 | -0.89557 | -0.60257 |  |
| 235803 | at   | -1.52046 | -0.60451 | 1.520462 | down | -2.11535 | -1.0809  | 2.115349 | down | 0 | -0.60451 | -1.0809  |  |
| 236511 | at   | -1.59273 | -0.67151 | 1.592734 | down | -1.59273 | -0.67151 | 1.592734 | down | 0 | -0.67151 | -0.67151 |  |
| 238146 | at   | -1.54578 | -0.62833 | 1.545776 | down | -1.79352 | -0.84279 | 1.793517 | down | 0 | -0.62833 | -0.84279 |  |
| 238299 | at   | -1.55227 | -0.63438 | 1.552271 | down | -1.57389 | -0.65434 | 1.573892 | down | 0 | -0.63438 | -0.65434 |  |
| 238718 | at   | -1.65855 | -0.72993 | 1.658553 | down | -1.92985 | -0.94849 | 1.929851 | down | 0 | -0.72993 | -0.94849 |  |
| 238774 | at   | -2.11792 | -1.08265 | 2.117921 | down | -1.60518 | -0.68273 | 1.605179 | down | 0 | -1.08265 | -0.68273 |  |
| 239184 | at   | -1.51652 | -0.60076 | 1.516518 | down | -1.95311 | -0.96577 | 1.953107 | down | 0 | -0.60076 | -0.96577 |  |
| 239516 | at   | -2.15971 | -1.11084 | 2.159708 | down | -1.88011 | -0.91081 | 1.880107 | down | 0 | -1.11084 | -0.91081 |  |
| 239735 | at   | -1.58176 | -0.66153 | 1.581763 | down | -1.58176 | -0.66153 | 1.581763 | down | 0 | -0.66153 | -0.66153 |  |
| 240165 | at   | -1.64872 | -0.72135 | 1.648719 | down | -1.85891 | -0.89445 | 1.858906 | down | 0 | -0.72135 | -0.89445 |  |
| 241864 | x at | -1.68935 | -0.75646 | 1.689346 | down | -1.9611  | -0.97166 | 1.961096 | down | 0 | -0.75646 | -0.97166 |  |
| 241885 | at   | -1.54159 | -0.62442 | 1.541587 | down | -1.54159 | -0.62442 | 1.541587 | down | 0 | -0.62442 | -0.62442 |  |
| 241991 | at   | -1.56015 | -0.64168 | 1.560149 | down | -1.50949 | -0.59406 | 1.509493 | down | 0 | -0.64168 | -0.59406 |  |
| 242052 | at   | -2.3525  | -1.2342  | 2.352505 | down | -1.73994 | -0.79904 | 1.739941 | down | 0 | -1.2342  | -0.79904 |  |
| 242068 | at   | -1.99273 | -0.99475 | 1.99273  | down | -1.54255 | -0.62532 | 1.542552 | down | 0 | -0.99475 | -0.62532 |  |
| 242233 | at   | -1.55437 | -0.63633 | 1.554369 | down | -1.75875 | -0.81455 | 1.75875  | down | 0 | -0.63633 | -0.81455 |  |
| 242428 | at   | -1.55676 | -0.63854 | 1.556758 | down | -1.52544 | -0.60922 | 1.525437 | down | 0 | -0.63854 | -0.60922 |  |
| 242471 | at   | -3.1728  | -1.66576 | 3.172802 | down | -2.41896 | -1.27439 | 2.418957 | down | 0 | -1.66576 | -1.27439 |  |
| 242476 | at   | -1.88686 | -0.91599 | 1.886863 | down | -1.56404 | -0.64528 | 1.564042 | down | 0 | -0.91599 | -0.64528 |  |
| 242606 | at   | -1.76148 | -0.81679 | 1.76148  | down | -1.88878 | -0.91745 | 1.888777 | down | 0 | -0.81679 | -0.91745 |  |
| 242607 | at   | -2.04891 | -1.03485 | 2.048907 | down | -1.67165 | -0.74127 | 1.671651 | down | 0 | -1.03485 | -0.74127 |  |
| 242688 | at   | -1.76231 | -0.81747 | 1.762311 | down | -1.53345 | -0.61678 | 1.533451 | down | 0 | -0.81747 | -0.61678 |  |
| 242691 | at   | -1.52749 | -0.61116 | 1.52749  | down | -1.52749 | -0.61116 | 1.52749  | down | 0 | -0.61116 | -0.61116 |  |
| 242725 | at   | -1.65104 | -0.72337 | 1.651037 | down | -1.82629 | -0.86892 | 1.826294 | down | 0 | -0.72337 | -0.86892 |  |
| 242772 | x at | -1.52796 | -0.61161 | 1.527964 | down | -1.52796 | -0.61161 | 1.527964 | down | 0 | -0.61161 | -0.61161 |  |
| 243023 | at   | -2.11398 | -1.07996 | 2.113979 | down | -2.11398 | -1.07996 | 2.113979 | down | 0 | -1.07996 | -1.07996 |  |
| 243378 | at   | -1.98793 | -0.99126 | 1.987926 | down | -2.2643  | -1.17907 | 2.264301 | down | 0 | -0.99126 | -1.17907 |  |
| 243768 | at   | -1.66363 | -0.73433 | 1.66363  | down | -1.66363 | -0.73433 | 1.66363  | down | 0 | -0.73433 | -0.73433 |  |



|         |      |          |          |          |      |          |          |          |      |   |          |          |               |
|---------|------|----------|----------|----------|------|----------|----------|----------|------|---|----------|----------|---------------|
| 244014  | x at | -1.53214 | -0.61554 | 1.532136 | down | -1.6169  | -0.69323 | 1.616896 | down | 0 | -0.61554 | -0.69323 |               |
| 244503  | at   | -1.68794 | -0.75527 | 1.687944 | down | -2.07145 | -1.05064 | 2.071451 | down | 0 | -0.75527 | -1.05064 |               |
| 1555897 | at   | -1.65874 | -0.73009 | 1.658744 | down | -1.65874 | -0.73009 | 1.658744 | down | 0 | -0.73009 | -0.73009 |               |
| 1555973 | at   | -1.57115 | -0.65182 | 1.571154 | down | -1.59198 | -0.67082 | 1.591982 | down | 0 | -0.65182 | -0.67082 |               |
| 1556081 | at   | -1.90045 | -0.92634 | 1.900453 | down | -2.321   | -1.21475 | 2.320998 | down | 0 | -0.92634 | -1.21475 |               |
| 1558445 | at   | -1.96431 | -0.97402 | 1.96431  | down | -2.12291 | -1.08604 | 2.122905 | down | 0 | -0.97402 | -1.08604 |               |
| 1558605 | at   | -2.16109 | -1.11176 | 2.161087 | down | -1.61299 | -0.68973 | 1.612985 | down | 0 | -1.11176 | -0.68973 |               |
| 1558854 | a at | -1.62003 | -0.69602 | 1.620031 | down | -1.62003 | -0.69602 | 1.620031 | down | 0 | -0.69602 | -0.69602 |               |
| 1559006 | at   | -1.97746 | -0.98365 | 1.977461 | down | -2.72075 | -1.44401 | 2.720752 | down | 0 | -0.98365 | -1.44401 |               |
| 1559007 | s at | -1.80863 | -0.8549  | 1.808627 | down | -1.72882 | -0.78979 | 1.72882  | down | 0 | -0.8549  | -0.78979 |               |
| 1559776 | at   | -1.62334 | -0.69896 | 1.623337 | down | -1.56619 | -0.64726 | 1.566189 | down | 0 | -0.69896 | -0.64726 |               |
| 1560048 | at   | -1.87063 | -0.90352 | 1.87063  | down | -1.87063 | -0.90352 | 1.87063  | down | 0 | -0.90352 | -0.90352 |               |
| 1562529 | s at | -1.59675 | -0.67514 | 1.596747 | down | -1.81253 | -0.858   | 1.812528 | down | 0 | -0.67514 | -0.858   |               |
| 1563467 | at   | -1.70428 | -0.76917 | 1.704284 | down | -1.54102 | -0.62388 | 1.541017 | down | 0 | -0.76917 | -0.62388 |               |
| 1565577 | s at | -1.95966 | -0.9706  | 1.959662 | down | -2.2638  | -1.17874 | 2.263795 | down | 0 | -0.9706  | -1.17874 |               |
| 1565886 | at   | -1.60064 | -0.67865 | 1.600644 | down | -1.51403 | -0.59839 | 1.514029 | down | 0 | -0.67865 | -0.59839 |               |
| 1569129 | s at | -1.65758 | -0.72908 | 1.657577 | down | -1.66859 | -0.73863 | 1.668587 | down | 0 | -0.72908 | -0.73863 |               |
| 1569167 | at   | -1.70257 | -0.76771 | 1.702567 | down | -1.73122 | -0.79179 | 1.731217 | down | 0 | -0.76771 | -0.79179 |               |
| 213353  | at   | 1.564984 | 0.646148 | 1.564984 | up   | 1.591914 | 0.670762 | 1.591914 | up   | 0 | 0.646148 | 0.670762 | ABCA5         |
| 208561  | at   | 2.700569 | 1.433263 | 2.700569 | up   | 2.891068 | 1.531602 | 2.891068 | up   | 0 | 1.433263 | 1.531602 | ABCC9         |
| 208562  | s at | 1.800242 | 0.848191 | 1.800242 | up   | 1.755287 | 0.811707 | 1.755287 | up   | 0 | 0.848191 | 0.811707 | ABCC9         |
| 205566  | at   | 1.824924 | 0.867836 | 1.824924 | up   | 1.871669 | 0.904325 | 1.871669 | up   | 0 | 0.867836 | 0.904325 | ABHD2         |
| 220606  | s at | 1.572217 | 0.652801 | 1.572217 | up   | 1.572217 | 0.652801 | 1.572217 | up   | 0 | 0.652801 | 0.652801 | ADPRM         |
| 223401  | at   | 1.787679 | 0.838088 | 1.787679 | up   | 1.606735 | 0.684132 | 1.606735 | up   | 0 | 0.838088 | 0.684132 | ADPRM         |
| 204183  | s at | 1.503328 | 0.58816  | 1.503328 | up   | 1.555349 | 0.637238 | 1.555349 | up   | 0 | 0.58816  | 0.637238 | ADRBK2        |
| 229354  | at   | 1.586358 | 0.665718 | 1.586358 | up   | 1.719771 | 0.782216 | 1.719771 | up   | 0 | 0.665718 | 0.782216 | AHRR          |
| 220987  | s at | 1.566352 | 0.647409 | 1.566352 | up   | 1.566352 | 0.647409 | 1.566352 | up   | 0 | 0.647409 | 0.647409 | AKIP1///NUAK2 |
| 222383  | s at | 1.899509 | 0.925627 | 1.899509 | up   | 2.123148 | 1.086205 | 2.123148 | up   | 0 | 0.925627 | 1.086205 | ALOXE3        |
| 228415  | at   | 1.786662 | 0.837267 | 1.786662 | up   | 1.861887 | 0.896766 | 1.861887 | up   | 0 | 0.837267 | 0.896766 | AP1S2         |
| 209913  | x at | 1.892622 | 0.920386 | 1.892622 | up   | 1.898445 | 0.924818 | 1.898445 | up   | 0 | 0.920386 | 0.924818 | AP5Z1         |
| 213419  | at   | 1.726333 | 0.787711 | 1.726333 | up   | 1.524208 | 0.608059 | 1.524208 | up   | 0 | 0.787711 | 0.608059 | APBB2         |
| 40148   | at   | 1.576239 | 0.656486 | 1.576239 | up   | 1.552831 | 0.634901 | 1.552831 | up   | 0 | 0.656486 | 0.634901 | APBB2         |
| 213618  | at   | 2.593432 | 1.374863 | 2.593432 | up   | 1.952754 | 0.96551  | 1.952754 | up   | 0 | 1.374863 | 0.96551  | ARAP2         |
| 1555902 | at   | 1.559431 | 0.64102  | 1.559431 | up   | 1.730632 | 0.791299 | 1.730632 | up   | 0 | 0.64102  | 0.791299 | ARMCX5        |
| 209824  | s at | 1.717092 | 0.779967 | 1.717092 | up   | 1.604462 | 0.682089 | 1.604462 | up   | 0 | 0.779967 | 0.682089 | ARNTL         |
| 225283  | at   | 1.770431 | 0.824101 | 1.770431 | up   | 1.513684 | 0.598064 | 1.513684 | up   | 0 | 0.824101 | 0.598064 | ARRDC4        |
| 202672  | s at | 4.816474 | 2.267977 | 4.816474 | up   | 4.642235 | 2.214819 | 4.642235 | up   | 0 | 2.267977 | 2.214819 | ATF3          |
| 1554980 | a at | 4.11003  | 2.039149 | 4.11003  | up   | 3.734306 | 1.90084  | 3.734306 | up   | 0 | 2.039149 | 1.90084  | ATF3          |
| 218987  | at   | 1.534876 | 0.618122 | 1.534876 | up   | 1.614903 | 0.691448 | 1.614903 | up   | 0 | 0.618122 | 0.691448 | ATF7IP        |
| 212471  | at   | 1.515716 | 0.6      | 1.515716 | up   | 1.546693 | 0.629187 | 1.546693 | up   | 0 | 0.6      | 0.629187 | AVL9          |
| 203304  | at   | 1.58986  | 0.6689   | 1.58986  | up   | 1.662812 | 0.733625 | 1.662812 | up   | 0 | 0.6689   | 0.733625 | BAMBI         |
| 207671  | s at | 1.737313 | 0.796858 | 1.737313 | up   | 1.640628 | 0.714248 | 1.640628 | up   | 0 | 0.796858 | 0.714248 | BEST1         |
| 218332  | at   | 1.566254 | 0.647318 | 1.566254 | up   | 1.580193 | 0.660101 | 1.580193 | up   | 0 | 0.647318 | 0.660101 | BEX1          |
| 210538  | s at | 3.146209 | 1.653615 | 3.146209 | up   | 3.195384 | 1.675989 | 3.195384 | up   | 0 | 1.653615 | 1.675989 | BIRC3         |

|         |      |          |          |          |    |          |          |          |    |   |          |          |          |
|---------|------|----------|----------|----------|----|----------|----------|----------|----|---|----------|----------|----------|
| 242579  | at   | 1.533451 | 0.616782 | 1.533451 | up | 1.675466 | 0.744562 | 1.675466 | up | 0 | 0.616782 | 0.744562 | BMPR1B   |
| 1555773 | at   | 1.585075 | 0.664551 | 1.585075 | up | 1.596439 | 0.674857 | 1.596439 | up | 0 | 0.664551 | 0.674857 | BPIFC    |
| 236402  | at   | 1.921019 | 0.941872 | 1.921019 | up | 1.843096 | 0.882131 | 1.843096 | up | 0 | 0.941872 | 0.882131 | BRAF     |
| 227099  | s at | 1.886405 | 0.915639 | 1.886405 | up | 1.604184 | 0.681839 | 1.604184 | up | 0 | 0.915639 | 0.681839 | C11orf96 |
| 222767  | s at | 1.549938 | 0.632211 | 1.549938 | up | 1.699365 | 0.764996 | 1.699365 | up | 0 | 0.632211 | 0.764996 | C12orf49 |
| 235026  | at   | 1.50058  | 0.58552  | 1.50058  | up | 1.576161 | 0.656415 | 1.576161 | up | 0 | 0.58552  | 0.656415 | C12orf66 |
| 217767  | at   | 2.507407 | 1.326196 | 2.507407 | up | 2.378602 | 1.250114 | 2.378602 | up | 0 | 1.326196 | 1.250114 | C3       |
| 218541  | s at | 2.006092 | 1.004388 | 2.006092 | up | 1.828986 | 0.871044 | 1.828986 | up | 0 | 1.004388 | 0.871044 | C8orf4   |
| 232270  | at   | 1.541078 | 0.62394  | 1.541078 | up | 1.616028 | 0.692452 | 1.616028 | up | 0 | 0.62394  | 0.692452 | C9orf3   |
| 209030  | s at | 1.686829 | 0.754314 | 1.686829 | up | 1.84304  | 0.882087 | 1.84304  | up | 0 | 0.754314 | 0.882087 | CADM1    |
| 225331  | at   | 1.525491 | 0.609274 | 1.525491 | up | 1.566795 | 0.647817 | 1.566795 | up | 0 | 0.609274 | 0.647817 | CCDC50   |
| 209378  | s at | 1.890011 | 0.918395 | 1.890011 | up | 2.119906 | 1.084    | 2.119906 | up | 0 | 0.918395 | 1.084    | CCSER2   |
| 228910  | at   | 1.537667 | 0.620743 | 1.537667 | up | 1.581571 | 0.661358 | 1.581571 | up | 0 | 0.620743 | 0.661358 | CD82     |
| 212942  | s at | 2.029405 | 1.021057 | 2.029405 | up | 1.896269 | 0.923163 | 1.896269 | up | 0 | 1.021057 | 0.923163 | CEMIP    |
| 206861  | s at | 1.636015 | 0.710186 | 1.636015 | up | 1.712024 | 0.775703 | 1.712024 | up | 0 | 0.710186 | 0.775703 | CGGBP1   |
| 206932  | at   | 2.280811 | 1.189547 | 2.280811 | up | 2.248088 | 1.168698 | 2.248088 | up | 0 | 1.189547 | 1.168698 | CH25H    |
| 219270  | at   | 2.140295 | 1.09781  | 2.140295 | up | 2.174358 | 1.120589 | 2.174358 | up | 0 | 1.09781  | 1.120589 | CHAC1    |
| 219634  | at   | 2.121744 | 1.085251 | 2.121744 | up | 2.133468 | 1.093201 | 2.133468 | up | 0 | 1.085251 | 1.093201 | CHST11   |
| 222549  | at   | 1.972224 | 0.979823 | 1.972224 | up | 1.54943  | 0.631738 | 1.54943  | up | 0 | 0.979823 | 0.631738 | CLDN1    |
| 208096  | s at | 2.024985 | 1.017911 | 2.024985 | up | 2.201455 | 1.138457 | 2.201455 | up | 0 | 1.017911 | 1.138457 | COL21A1  |
| 201942  | s at | 1.685027 | 0.752771 | 1.685027 | up | 1.842484 | 0.881652 | 1.842484 | up | 0 | 0.752771 | 0.881652 | CPD      |
| 207442  | at   | 2.023101 | 1.016568 | 2.023101 | up | 2.303799 | 1.204015 | 2.303799 | up | 0 | 1.016568 | 1.204015 | CSF3     |
| 206085  | s at | 2.173237 | 1.119845 | 2.173237 | up | 2.240097 | 1.163561 | 2.240097 | up | 0 | 1.119845 | 1.163561 | CTH      |
| 217127  | at   | 1.979575 | 0.98519  | 1.979575 | up | 1.898479 | 0.924844 | 1.898479 | up | 0 | 0.98519  | 0.924844 | CTH      |
| 204470  | at   | 2.306001 | 1.205393 | 2.306001 | up | 2.291224 | 1.196118 | 2.291224 | up | 0 | 1.205393 | 1.196118 | CXCL1    |
| 209774  | x at | 4.152156 | 2.053861 | 4.152156 | up | 3.799508 | 1.925813 | 3.799508 | up | 0 | 2.053861 | 1.925813 | CXCL2    |
| 207850  | at   | 2.751014 | 1.459963 | 2.751014 | up | 2.42954  | 1.280683 | 2.42954  | up | 0 | 1.459963 | 1.280683 | CXCL3    |
| 214974  | x at | 1.810511 | 0.856397 | 1.810511 | up | 1.810511 | 0.856397 | 1.810511 | up | 0 | 0.856397 | 0.856397 | CXCL5    |
| 202859  | x at | 8.254849 | 3.045242 | 8.254849 | up | 7.551652 | 2.916792 | 7.551652 | up | 0 | 3.045242 | 2.916792 | CXCL8    |
| 211506  | s at | 9.104867 | 3.186638 | 9.104867 | up | 8.555291 | 3.096817 | 8.555291 | up | 0 | 3.186638 | 3.096817 | CXCL8    |
| 221903  | s at | 1.910666 | 0.934075 | 1.910666 | up | 1.862456 | 0.897206 | 1.862456 | up | 0 | 0.934075 | 0.897206 | CYLD     |
| 222142  | at   | 1.567429 | 0.6484   | 1.567429 | up | 1.558175 | 0.639857 | 1.558175 | up | 0 | 0.6484   | 0.639857 | CYLD     |
| 205749  | at   | 2.331017 | 1.22096  | 2.331017 | up | 2.341274 | 1.227294 | 2.341274 | up | 0 | 1.22096  | 1.227294 | CYP1A1   |
| 203890  | s at | 2.291737 | 1.196442 | 2.291737 | up | 1.64258  | 0.715964 | 1.64258  | up | 0 | 1.196442 | 0.715964 | DAPK3    |
| 201893  | x at | 1.650385 | 0.722803 | 1.650385 | up | 1.728692 | 0.789681 | 1.728692 | up | 0 | 0.722803 | 0.789681 | DCN      |
| 211813  | x at | 1.829167 | 0.871187 | 1.829167 | up | 1.84608  | 0.884465 | 1.84608  | up | 0 | 0.871187 | 0.884465 | DCN      |
| 209383  | at   | 1.716542 | 0.779505 | 1.716542 | up | 1.660926 | 0.731988 | 1.660926 | up | 0 | 0.779505 | 0.731988 | DDIT3    |
| 212527  | at   | 1.58656  | 0.665902 | 1.58656  | up | 1.535098 | 0.618331 | 1.535098 | up | 0 | 0.665902 | 0.618331 | DESI1    |
| 206806  | at   | 1.842748 | 0.881859 | 1.842748 | up | 1.805186 | 0.852147 | 1.805186 | up | 0 | 0.881859 | 0.852147 | DGKI     |
| 206463  | s at | 2.461519 | 1.299549 | 2.461519 | up | 2.516365 | 1.331341 | 2.516365 | up | 0 | 1.299549 | 1.331341 | DHRS2    |
| 214079  | at   | 3.509491 | 1.811262 | 3.509491 | up | 3.551381 | 1.82838  | 3.551381 | up | 0 | 1.811262 | 1.82838  | DHRS2    |
| 200664  | s at | 1.995763 | 0.996941 | 1.995763 | up | 2.824477 | 1.497984 | 2.824477 | up | 0 | 0.996941 | 1.497984 | DNAJB1   |
| 200666  | s at | 1.664273 | 0.734892 | 1.664273 | up | 2.238227 | 1.162356 | 2.238227 | up | 0 | 0.734892 | 1.162356 | DNAJB1   |
| 212611  | at   | 1.814021 | 0.859191 | 1.814021 | up | 2.069327 | 1.049162 | 2.069327 | up | 0 | 0.859191 | 1.049162 | DTX4     |

|         |      |          |          |          |    |          |          |          |    |   |          |          |                          |
|---------|------|----------|----------|----------|----|----------|----------|----------|----|---|----------|----------|--------------------------|
| 214446  | at   | 1.675556 | 0.744639 | 1.675556 | up | 1.786642 | 0.837251 | 1.786642 | up | 0 | 0.744639 | 0.837251 | ELL2                     |
| 225698  | at   | 1.958952 | 0.970082 | 1.958952 | up | 1.932721 | 0.950633 | 1.932721 | up | 0 | 0.970082 | 0.950633 | EPB41L4A-AS1             |
| 227755  | at   | 2.337646 | 1.225056 | 2.337646 | up | 2.445849 | 1.290336 | 2.445849 | up | 0 | 1.225056 | 1.290336 | ERN1                     |
| 215594  | at   | 2.189075 | 1.130321 | 2.189075 | up | 1.8757   | 0.907429 | 1.8757   | up | 0 | 1.130321 | 0.907429 | ERV9-1                   |
| 201328  | at   | 1.536993 | 0.620111 | 1.536993 | up | 1.536993 | 0.620111 | 1.536993 | up | 0 | 0.620111 | 0.620111 | ETS2                     |
| 224225  | s at | 1.990035 | 0.992794 | 1.990035 | up | 1.832505 | 0.873817 | 1.832505 | up | 0 | 0.992794 | 0.873817 | ETV7                     |
| 223058  | at   | 1.533356 | 0.616693 | 1.533356 | up | 1.699212 | 0.764865 | 1.699212 | up | 0 | 0.616693 | 0.764865 | FAM107B                  |
| 221959  | at   | 1.66883  | 0.738837 | 1.66883  | up | 1.739837 | 0.798952 | 1.739837 | up | 0 | 0.738837 | 0.798952 | FAM110B                  |
| 229946  | at   | 1.683603 | 0.751552 | 1.683603 | up | 1.580075 | 0.659993 | 1.580075 | up | 0 | 0.751552 | 0.659993 | FAM168B                  |
| 229152  | at   | 2.225464 | 1.154106 | 2.225464 | up | 1.702219 | 0.767417 | 1.702219 | up | 0 | 1.154106 | 0.767417 | FDCSP                    |
| 231382  | at   | 1.72235  | 0.784379 | 1.72235  | up | 1.931883 | 0.950007 | 1.931883 | up | 0 | 0.784379 | 0.950007 | FGF18                    |
| 204421  | s at | 1.805695 | 0.852554 | 1.805695 | up | 1.846205 | 0.884563 | 1.846205 | up | 0 | 0.852554 | 0.884563 | FGF2                     |
| 226769  | at   | 1.589844 | 0.668885 | 1.589844 | up | 1.655785 | 0.727515 | 1.655785 | up | 0 | 0.668885 | 0.727515 | FIBIN                    |
| 204135  | at   | 2.18896  | 1.130246 | 2.18896  | up | 2.144784 | 1.100833 | 2.144784 | up | 0 | 1.130246 | 1.100833 | FILIP1L                  |
| 1554966 | a at | 2.447275 | 1.291176 | 2.447275 | up | 2.149028 | 1.103684 | 2.149028 | up | 0 | 1.291176 | 1.103684 | FILIP1L                  |
| 213524  | s at | 2.184301 | 1.127172 | 2.184301 | up | 2.435544 | 1.284244 | 2.435544 | up | 0 | 1.127172 | 1.284244 | GOS2                     |
| 203725  | at   | 2.647621 | 1.404697 | 2.647621 | up | 2.556834 | 1.354359 | 2.556834 | up | 0 | 1.404697 | 1.354359 | GADD45A                  |
| 207574  | s at | 1.773154 | 0.826318 | 1.773154 | up | 1.885514 | 0.914958 | 1.885514 | up | 0 | 0.826318 | 0.914958 | GADD45B                  |
| 209305  | s at | 2.081285 | 1.057475 | 2.081285 | up | 1.953699 | 0.966208 | 1.953699 | up | 0 | 1.057475 | 0.966208 | GADD45B                  |
| 204121  | at   | 1.7089   | 0.773068 | 1.7089   | up | 1.7089   | 0.773068 | 1.7089   | up | 0 | 0.773068 | 0.773068 | GADD45G                  |
| 209602  | s at | 1.68151  | 0.749757 | 1.68151  | up | 1.605565 | 0.683081 | 1.605565 | up | 0 | 0.749757 | 0.683081 | GATA3                    |
| 209604  | s at | 2.1743   | 1.120551 | 2.1743   | up | 2.173592 | 1.120081 | 2.173592 | up | 0 | 1.120551 | 1.120081 | GATA3                    |
| 203158  | s at | 1.73982  | 0.798938 | 1.73982  | up | 1.905948 | 0.930509 | 1.905948 | up | 0 | 0.798938 | 0.930509 | GLS                      |
| 219078  | at   | 1.584254 | 0.663804 | 1.584254 | up | 1.612607 | 0.689395 | 1.612607 | up | 0 | 0.663804 | 0.689395 | GPATCH2                  |
| 223789  | s at | 1.610995 | 0.687952 | 1.610995 | up | 1.610995 | 0.687952 | 1.610995 | up | 0 | 0.687952 | 0.687952 | GTPBP2                   |
| 204235  | s at | 1.506834 | 0.59152  | 1.506834 | up | 1.631181 | 0.705917 | 1.631181 | up | 0 | 0.59152  | 0.705917 | GULP1                    |
| 205659  | at   | 2.073684 | 1.052196 | 2.073684 | up | 1.816308 | 0.861009 | 1.816308 | up | 0 | 1.052196 | 0.861009 | HDAC9                    |
| 230968  | at   | 1.666925 | 0.737189 | 1.666925 | up | 1.616064 | 0.692484 | 1.616064 | up | 0 | 0.737189 | 0.692484 | HDAC9                    |
| 232080  | at   | 1.658517 | 0.729894 | 1.658517 | up | 1.623941 | 0.699499 | 1.623941 | up | 0 | 0.729894 | 0.699499 | HECW2                    |
| 203394  | s at | 1.906617 | 0.931015 | 1.906617 | up | 2.515835 | 1.331038 | 2.515835 | up | 0 | 0.931015 | 1.331038 | HES1                     |
| 203395  | s at | 1.643638 | 0.716893 | 1.643638 | up | 1.995517 | 0.996762 | 1.995517 | up | 0 | 0.716893 | 0.996762 | HES1                     |
| 215071  | s at | 2.631793 | 1.396046 | 2.631793 | up | 2.275119 | 1.185942 | 2.275119 | up | 0 | 1.396046 | 1.185942 | HIST1H2AC                |
| 214472  | at   | 3.187055 | 1.672224 | 3.187055 | up | 2.068046 | 1.048268 | 2.068046 | up | 0 | 1.672224 | 1.048268 | HIST1H2AD///HIST1H3D     |
| 214455  | at   | 2.751158 | 1.460039 | 2.751158 | up | 2.247915 | 1.168587 | 2.247915 | up | 0 | 1.460039 | 1.168587 | HIST1H2BC                |
| 209911  | x at | 1.970755 | 0.978748 | 1.970755 | up | 1.59968  | 0.677783 | 1.59968  | up | 0 | 0.978748 | 0.677783 | HIST1H2BD                |
| 214502  | at   | 2.841921 | 1.506867 | 2.841921 | up | 1.991983 | 0.994205 | 1.991983 | up | 0 | 1.506867 | 0.994205 | HIST1H2BJ///LOC105374995 |
| 208180  | s at | 2.466506 | 1.302469 | 2.466506 | up | 1.883852 | 0.913685 | 1.883852 | up | 0 | 1.302469 | 0.913685 | HIST1H4H                 |
| 207046  | at   | 2.078147 | 1.055298 | 2.078147 | up | 1.935679 | 0.952839 | 1.935679 | up | 0 | 1.055298 | 0.952839 | HIST2H4A///HIST2H4B      |
| 204753  | s at | 1.909987 | 0.933563 | 1.909987 | up | 2.396212 | 1.260756 | 2.396212 | up | 0 | 0.933563 | 1.260756 | HLF                      |
| 204755  | x at | 1.516147 | 0.60041  | 1.516147 | up | 1.588587 | 0.667744 | 1.588587 | up | 0 | 0.60041  | 0.667744 | HLF                      |
| 203665  | at   | 1.867196 | 0.900873 | 1.867196 | up | 1.72993  | 0.790713 | 1.72993  | up | 0 | 0.900873 | 0.790713 | HMOX1                    |
| 200799  | at   | 4.880279 | 2.286964 | 4.880279 | up | 7.555505 | 2.917528 | 7.555505 | up | 0 | 2.286964 | 2.917528 | HSPA1A///HSPA1B          |
| 200800  | s at | 2.372331 | 1.246306 | 2.372331 | up | 3.083957 | 1.624783 | 3.083957 | up | 0 | 1.246306 | 1.624783 | HSPA1A///HSPA1B          |
| 202581  | at   | 1.956412 | 0.96821  | 1.956412 | up | 2.684993 | 1.424918 | 2.684993 | up | 0 | 0.96821  | 1.424918 | HSPA1A///HSPA1B          |

|              |          |          |          |    |          |          |          |    |   |          |          |                                                   |
|--------------|----------|----------|----------|----|----------|----------|----------|----|---|----------|----------|---------------------------------------------------|
| 117 at       | 4.91763  | 2.297963 | 4.91763  | up | 8.506181 | 3.088512 | 8.506181 | up | 0 | 2.297963 | 3.088512 | HSPA6                                             |
| 213418 at    | 11.884   | 3.570949 | 11.884   | up | 22.31338 | 4.479837 | 22.31338 | up | 0 | 3.570949 | 4.479837 | HSPA6                                             |
| 219284 at    | 2.564611 | 1.35874  | 2.564611 | up | 2.378847 | 1.250262 | 2.378847 | up | 0 | 1.35874  | 1.250262 | HSPBAP1                                           |
| 208744 x at  | 1.580477 | 0.66036  | 1.580477 | up | 1.943856 | 0.958921 | 1.943856 | up | 0 | 0.66036  | 0.958921 | HSPH1                                             |
| 202439 s at  | 1.638055 | 0.711984 | 1.638055 | up | 1.6483   | 0.720979 | 1.6483   | up | 0 | 0.711984 | 0.720979 | IDS                                               |
| 217432 s at  | 1.735033 | 0.794963 | 1.735033 | up | 1.913808 | 0.936446 | 1.913808 | up | 0 | 0.794963 | 0.936446 | IDS                                               |
| 210118 s at  | 3.70492  | 1.889442 | 3.70492  | up | 3.423411 | 1.775435 | 3.423411 | up | 0 | 1.889442 | 1.775435 | IL1A                                              |
| 205067 at    | 4.767488 | 2.253229 | 4.767488 | up | 5.044926 | 2.334833 | 5.044926 | up | 0 | 2.253229 | 2.334833 | IL1B                                              |
| 39402 at     | 4.492022 | 2.167365 | 4.492022 | up | 4.78788  | 2.259387 | 4.78788  | up | 0 | 2.167365 | 2.259387 | IL1B                                              |
| 207526 s at  | 4.031469 | 2.011306 | 4.031469 | up | 6.70347  | 2.744908 | 6.70347  | up | 0 | 2.011306 | 2.744908 | IL1RL1                                            |
| 1555431 a at | 1.542331 | 0.625113 | 1.542331 | up | 1.700831 | 0.76624  | 1.700831 | up | 0 | 0.625113 | 0.76624  | IL31RA                                            |
| 205207 at    | 3.278098 | 1.712859 | 3.278098 | up | 3.386521 | 1.759804 | 3.386521 | up | 0 | 1.712859 | 1.759804 | IL6                                               |
| 210587 at    | 2.025027 | 1.017941 | 2.025027 | up | 1.824251 | 0.867304 | 1.824251 | up | 0 | 1.017941 | 0.867304 | INHBE                                             |
| 205376 at    | 2.133441 | 1.093182 | 2.133441 | up | 2.140502 | 1.097949 | 2.140502 | up | 0 | 1.093182 | 1.097949 | INPP4B                                            |
| 237056 at    | 2.2982   | 1.200504 | 2.2982   | up | 1.559147 | 0.640757 | 1.559147 | up | 0 | 1.200504 | 0.640757 | INSC                                              |
| 202531 at    | 2.127229 | 1.088975 | 2.127229 | up | 2.065395 | 1.046418 | 2.065395 | up | 0 | 1.088975 | 1.046418 | IRF1                                              |
| 209743 s at  | 1.60197  | 0.679847 | 1.60197  | up | 1.65121  | 0.723523 | 1.65121  | up | 0 | 0.679847 | 0.723523 | ITCH                                              |
| 209744 x at  | 1.647742 | 0.72049  | 1.647742 | up | 1.770269 | 0.823969 | 1.770269 | up | 0 | 0.72049  | 0.823969 | ITCH                                              |
| 217094 s at  | 1.648474 | 0.721131 | 1.648474 | up | 1.724017 | 0.785774 | 1.724017 | up | 0 | 0.721131 | 0.785774 | ITCH                                              |
| 211339 s at  | 1.605287 | 0.682831 | 1.605287 | up | 1.725679 | 0.787164 | 1.725679 | up | 0 | 0.682831 | 0.787164 | ITK                                               |
| 226267 at    | 1.542753 | 0.625507 | 1.542753 | up | 1.525068 | 0.608873 | 1.525068 | up | 0 | 0.625507 | 0.608873 | JDP2                                              |
| 241985 at    | 1.759215 | 0.814931 | 1.759215 | up | 2.102007 | 1.071768 | 2.102007 | up | 0 | 0.814931 | 1.071768 | JMY                                               |
| 242855 at    | 1.504302 | 0.589095 | 1.504302 | up | 1.94389  | 0.958946 | 1.94389  | up | 0 | 0.589095 | 0.958946 | KCP                                               |
| 211124 s at  | 1.692377 | 0.759051 | 1.692377 | up | 1.789196 | 0.839311 | 1.789196 | up | 0 | 0.759051 | 0.839311 | KITLG                                             |
| 202393 s at  | 1.686332 | 0.753888 | 1.686332 | up | 1.64543  | 0.718465 | 1.64543  | up | 0 | 0.753888 | 0.718465 | KLF10                                             |
| 221985 at    | 2.035907 | 1.025672 | 2.035907 | up | 1.927689 | 0.946872 | 1.927689 | up | 0 | 1.025672 | 0.946872 | KLHL24                                            |
| 221986 s at  | 1.567742 | 0.648688 | 1.567742 | up | 1.740164 | 0.799223 | 1.740164 | up | 0 | 0.648688 | 0.799223 | KLHL24                                            |
| 200770 s at  | 1.567619 | 0.648575 | 1.567619 | up | 1.567619 | 0.648575 | 1.567619 | up | 0 | 0.648575 | 0.648575 | LAMC1                                             |
| 227013 at    | 1.55203  | 0.634156 | 1.55203  | up | 1.567695 | 0.648644 | 1.567695 | up | 0 | 0.634156 | 0.648644 | LATS2                                             |
| 205266 at    | 2.792918 | 1.481773 | 2.792918 | up | 2.830286 | 1.500948 | 2.830286 | up | 0 | 1.481773 | 1.500948 | LIF                                               |
| 1566986 at   | 2.206442 | 1.141722 | 2.206442 | up | 2.357796 | 1.237439 | 2.357796 | up | 0 | 1.141722 | 1.237439 | LINC00674                                         |
| 243905 at    | 1.896481 | 0.923325 | 1.896481 | up | 2.056581 | 1.040248 | 2.056581 | up | 0 | 0.923325 | 1.040248 | LINC00944                                         |
| 215223 s at  | 1.934307 | 0.951817 | 1.934307 | up | 2.030337 | 1.021719 | 2.030337 | up | 0 | 0.951817 | 1.021719 | LOC100129518///SOD2                               |
| 236042 at    | 1.529364 | 0.612932 | 1.529364 | up | 1.662296 | 0.733177 | 1.662296 | up | 0 | 0.612932 | 0.733177 | LOC100130219                                      |
| 231089 at    | 1.606852 | 0.684237 | 1.606852 | up | 1.780604 | 0.832366 | 1.780604 | up | 0 | 0.684237 | 0.832366 | LOC100505664                                      |
| 210365 at    | 1.559969 | 0.641517 | 1.559969 | up | 2.063821 | 1.045318 | 2.063821 | up | 0 | 0.641517 | 1.045318 | LOC100506403///RUNX1                              |
| 229872 s at  | 1.877931 | 0.909144 | 1.877931 | up | 1.708517 | 0.772744 | 1.708517 | up | 0 | 0.909144 | 0.772744 | LOC100996720///LOC100996740//LOC642441//LOC730257 |
| 1562274 at   | 1.79985  | 0.847876 | 1.79985  | up | 1.52638  | 0.610115 | 1.52638  | up | 0 | 0.847876 | 0.610115 | LOC101928446                                      |
| 231412 at    | 2.497162 | 1.32029  | 2.497162 | up | 2.287993 | 1.194083 | 2.287993 | up | 0 | 1.32029  | 1.194083 | LOC101929709                                      |
| 1561667 at   | 1.806453 | 0.85316  | 1.806453 | up | 1.792225 | 0.841752 | 1.792225 | up | 0 | 0.85316  | 0.841752 | LOC105370642                                      |
| 1561342 at   | 1.532909 | 0.616272 | 1.532909 | up | 1.532909 | 0.616272 | 1.532909 | up | 0 | 0.616272 | 0.616272 | LOC105372742//LOC150005                           |
| 220009 at    | 1.563082 | 0.644393 | 1.563082 | up | 1.671566 | 0.7412   | 1.671566 | up | 0 | 0.644393 | 0.7412   | LONRF3                                            |
| 209840 s at  | 2.01244  | 1.008946 | 2.01244  | up | 1.863146 | 0.89774  | 1.863146 | up | 0 | 1.008946 | 0.89774  | LRRN3                                             |
| 209841 s at  | 2.000663 | 1.000478 | 2.000663 | up | 1.976128 | 0.982676 | 1.976128 | up | 0 | 1.000478 | 0.982676 | LRRN3                                             |

|              |          |          |          |    |          |          |          |    |   |          |          |              |
|--------------|----------|----------|----------|----|----------|----------|----------|----|---|----------|----------|--------------|
| 201744 s at  | 1.631124 | 0.705867 | 1.631124 | up | 1.546536 | 0.629041 | 1.546536 | up | 0 | 0.705867 | 0.629041 | LUM          |
| 205193 at    | 1.50665  | 0.591344 | 1.50665  | up | 1.50665  | 0.591344 | 1.50665  | up | 0 | 0.591344 | 0.591344 | MAFF         |
| 36711 at     | 1.67202  | 0.741592 | 1.67202  | up | 1.661974 | 0.732898 | 1.661974 | up | 0 | 0.741592 | 0.732898 | MAFF         |
| 205192 at    | 2.332789 | 1.222056 | 2.332789 | up | 2.317547 | 1.212598 | 2.317547 | up | 0 | 1.222056 | 1.212598 | MAP3K14      |
| 241541 at    | 1.553093 | 0.635144 | 1.553093 | up | 1.553093 | 0.635144 | 1.553093 | up | 0 | 0.635144 | 0.635144 | MTB2         |
| 204423 at    | 1.644347 | 0.717515 | 1.644347 | up | 1.621056 | 0.696934 | 1.621056 | up | 0 | 0.717515 | 0.696934 | MKLN1        |
| 204475 at    | 2.048603 | 1.03464  | 2.048603 | up | 2.353874 | 1.235037 | 2.353874 | up | 0 | 1.03464  | 1.235037 | MMP1         |
| 204575 s at  | 1.641119 | 0.71468  | 1.641119 | up | 1.545369 | 0.627952 | 1.545369 | up | 0 | 0.71468  | 0.627952 | MMP19        |
| 224385 s at  | 1.606408 | 0.683838 | 1.606408 | up | 1.630854 | 0.705628 | 1.630854 | up | 0 | 0.683838 | 0.705628 | MOV10L1      |
| 1552489 s at | 1.642239 | 0.715664 | 1.642239 | up | 1.573813 | 0.654264 | 1.573813 | up | 0 | 0.715664 | 0.654264 | MPP4         |
| 230361 at    | 1.720611 | 0.782921 | 1.720611 | up | 2.057626 | 1.040981 | 2.057626 | up | 0 | 0.782921 | 1.040981 | MROH1        |
| 209928 s at  | 1.934817 | 0.952197 | 1.934817 | up | 1.697776 | 0.763646 | 1.697776 | up | 0 | 0.952197 | 0.763646 | MSC          |
| 228846 at    | 2.238687 | 1.162653 | 2.238687 | up | 2.698633 | 1.432229 | 2.698633 | up | 0 | 1.162653 | 1.432229 | MXD1         |
| 219728 at    | 1.533734 | 0.617048 | 1.533734 | up | 1.929836 | 0.948478 | 1.929836 | up | 0 | 0.617048 | 0.948478 | MYOT         |
| 1568864 at   | 1.907769 | 0.931886 | 1.907769 | up | 1.775632 | 0.828332 | 1.775632 | up | 0 | 0.931886 | 0.828332 | MZF1-AS1     |
| 225344 at    | 1.707667 | 0.772027 | 1.707667 | up | 1.679967 | 0.748433 | 1.679967 | up | 0 | 0.772027 | 0.748433 | NCOA7        |
| 212445 s at  | 1.58095  | 0.660791 | 1.58095  | up | 1.526169 | 0.609915 | 1.526169 | up | 0 | 0.660791 | 0.609915 | NEDD4L       |
| 232593 at    | 6.017009 | 2.589047 | 6.017009 | up | 4.360928 | 2.124635 | 4.360928 | up | 0 | 2.589047 | 2.124635 | NEURL3       |
| 203574 at    | 2.042602 | 1.030408 | 2.042602 | up | 2.027069 | 1.019395 | 2.027069 | up | 0 | 1.030408 | 1.019395 | NFIL3        |
| 201502 s at  | 1.774949 | 0.827778 | 1.774949 | up | 1.684756 | 0.75254  | 1.684756 | up | 0 | 0.827778 | 0.75254  | NFKBIA       |
| 203927 at    | 1.963297 | 0.973279 | 1.963297 | up | 2.034947 | 1.024992 | 2.034947 | up | 0 | 0.973279 | 1.024992 | NFKBIE       |
| 223218 s at  | 1.70233  | 0.767511 | 1.70233  | up | 1.811991 | 0.857576 | 1.811991 | up | 0 | 0.767511 | 0.857576 | NFKBIZ       |
| 206814 at    | 2.008571 | 1.00617  | 2.008571 | up | 1.780633 | 0.83239  | 1.780633 | up | 0 | 1.00617  | 0.83239  | NGF          |
| 204760 s at  | 1.539851 | 0.622791 | 1.539851 | up | 1.656015 | 0.727716 | 1.656015 | up | 0 | 0.622791 | 0.727716 | NR1D1///THRA |
| 206038 s at  | 1.520894 | 0.604919 | 1.520894 | up | 1.848486 | 0.886344 | 1.848486 | up | 0 | 0.604919 | 0.886344 | NR2C2        |
| 206343 s at  | 2.176688 | 1.122134 | 2.176688 | up | 2.414901 | 1.271964 | 2.414901 | up | 0 | 1.122134 | 1.271964 | NRG1         |
| 211844 s at  | 1.839519 | 0.879329 | 1.839519 | up | 1.521919 | 0.605892 | 1.521919 | up | 0 | 0.879329 | 0.605892 | NRP2         |
| 223510 at    | 1.537547 | 0.62063  | 1.537547 | up | 1.569403 | 0.650216 | 1.569403 | up | 0 | 0.62063  | 0.650216 | NRP2         |
| 1555366 at   | 1.511096 | 0.595595 | 1.511096 | up | 1.511096 | 0.595595 | 1.511096 | up | 0 | 0.595595 | 0.595595 | NSAP11       |
| 226351 at    | 1.507631 | 0.592284 | 1.507631 | up | 1.533878 | 0.617184 | 1.533878 | up | 0 | 0.592284 | 0.617184 | NSUN4        |
| 209552 at    | 1.581051 | 0.660884 | 1.581051 | up | 1.519056 | 0.603175 | 1.519056 | up | 0 | 0.660884 | 0.603175 | PAX8         |
| 228425 at    | 3.682738 | 1.880779 | 3.682738 | up | 2.737738 | 1.452984 | 2.737738 | up | 0 | 1.880779 | 1.452984 | PAX8-AS1     |
| 208396 s at  | 2.204532 | 1.140472 | 2.204532 | up | 1.654349 | 0.726264 | 1.654349 | up | 0 | 1.140472 | 0.726264 | PDE1A        |
| 213556 at    | 1.844936 | 0.883571 | 1.844936 | up | 2.151886 | 1.105602 | 2.151886 | up | 0 | 0.883571 | 1.105602 | PINLYP       |
| 219155 at    | 1.54853  | 0.630899 | 1.54853  | up | 1.6908   | 0.757706 | 1.6908   | up | 0 | 0.630899 | 0.757706 | PITPNC1      |
| 209785 s at  | 1.666277 | 0.736628 | 1.666277 | up | 1.510488 | 0.595015 | 1.510488 | up | 0 | 0.736628 | 0.595015 | PLA2G4C      |
| 205479 s at  | 2.016689 | 1.011989 | 2.016689 | up | 2.190249 | 1.131095 | 2.190249 | up | 0 | 1.011989 | 1.131095 | PLAU         |
| 211668 s at  | 2.132264 | 1.092386 | 2.132264 | up | 2.399822 | 1.262927 | 2.399822 | up | 0 | 1.092386 | 1.262927 | PLAU         |
| 227037 at    | 1.913057 | 0.93588  | 1.913057 | up | 2.099336 | 1.069933 | 2.099336 | up | 0 | 0.93588  | 1.069933 | PLD6         |
| 201939 at    | 1.707206 | 0.771637 | 1.707206 | up | 1.575158 | 0.655497 | 1.575158 | up | 0 | 0.771637 | 0.655497 | PLK2         |
| 204285 s at  | 2.016744 | 1.012028 | 2.016744 | up | 2.170043 | 1.117724 | 2.170043 | up | 0 | 1.012028 | 1.117724 | PMAIP1       |
| 204286 s at  | 1.657625 | 0.729117 | 1.657625 | up | 1.760734 | 0.816177 | 1.760734 | up | 0 | 0.729117 | 0.816177 | PMAIP1       |
| 217875 s at  | 1.59478  | 0.673357 | 1.59478  | up | 1.508912 | 0.593508 | 1.508912 | up | 0 | 0.673357 | 0.593508 | PMEP1        |
| 222449 at    | 1.520683 | 0.60472  | 1.520683 | up | 1.520683 | 0.60472  | 1.520683 | up | 0 | 0.60472  | 0.60472  | PMEP1        |

|         |      |          |          |          |    |          |          |          |    |   |          |          |          |
|---------|------|----------|----------|----------|----|----------|----------|----------|----|---|----------|----------|----------|
| 222879  | s at | 1.600793 | 0.678787 | 1.600793 | up | 1.691842 | 0.758595 | 1.691842 | up | 0 | 0.678787 | 0.758595 | POLH     |
| 242218  | at   | 1.923521 | 0.943749 | 1.923521 | up | 2.131827 | 1.092091 | 2.131827 | up | 0 | 0.943749 | 1.092091 | PPARD    |
| 201489  | at   | 1.523404 | 0.607299 | 1.523404 | up | 1.536184 | 0.619351 | 1.536184 | up | 0 | 0.607299 | 0.619351 | PPIF     |
| 201490  | s at | 1.756268 | 0.812513 | 1.756268 | up | 1.647886 | 0.720616 | 1.647886 | up | 0 | 0.812513 | 0.720616 | PPIF     |
| 202014  | at   | 1.678544 | 0.747211 | 1.678544 | up | 1.724504 | 0.786181 | 1.724504 | up | 0 | 0.747211 | 0.786181 | PPP1R15A |
| 37028   | at   | 1.672772 | 0.742241 | 1.672772 | up | 1.687247 | 0.754671 | 1.687247 | up | 0 | 0.742241 | 0.754671 | PPP1R15A |
| 220672  | at   | 2.181563 | 1.125362 | 2.181563 | up | 2.323946 | 1.216577 | 2.323946 | up | 0 | 1.125362 | 1.216577 | PPP4R4   |
| 220673  | s at | 3.212792 | 1.683827 | 3.212792 | up | 3.060651 | 1.613839 | 3.060651 | up | 0 | 1.683827 | 1.613839 | PPP4R4   |
| 233002  | at   | 2.026257 | 1.018817 | 2.026257 | up | 2.026257 | 1.018817 | 2.026257 | up | 0 | 1.018817 | 1.018817 | PPP4R4   |
| 204748  | at   | 2.142626 | 1.09938  | 2.142626 | up | 2.095296 | 1.067154 | 2.095296 | up | 0 | 1.09938  | 1.067154 | PTGS2    |
| 1554997 | a at | 2.290476 | 1.195648 | 2.290476 | up | 2.605419 | 1.381516 | 2.605419 | up | 0 | 1.195648 | 1.381516 | PTGS2    |
| 208010  | s at | 1.692094 | 0.75881  | 1.692094 | up | 1.600419 | 0.67845  | 1.600419 | up | 0 | 0.75881  | 0.67845  | PTPN22   |
| 206157  | at   | 1.773517 | 0.826613 | 1.773517 | up | 1.573356 | 0.653845 | 1.573356 | up | 0 | 0.826613 | 0.653845 | PTX3     |
| 1562153 | a at | 1.825095 | 0.867971 | 1.825095 | up | 1.652621 | 0.724756 | 1.652621 | up | 0 | 0.867971 | 0.724756 | PVT1     |
| 229894  | s at | 1.826681 | 0.869225 | 1.826681 | up | 1.629295 | 0.704248 | 1.629295 | up | 0 | 0.869225 | 0.704248 | RAB43    |
| 219210  | s at | 1.695049 | 0.761327 | 1.695049 | up | 1.749168 | 0.806669 | 1.749168 | up | 0 | 0.761327 | 0.806669 | RAB8B    |
| 219494  | at   | 1.517006 | 0.601226 | 1.517006 | up | 1.526345 | 0.610081 | 1.526345 | up | 0 | 0.601226 | 0.610081 | RAD54B   |
| 205205  | at   | 2.221603 | 1.151601 | 2.221603 | up | 1.79726  | 0.845799 | 1.79726  | up | 0 | 1.151601 | 0.845799 | RELB     |
| 227339  | at   | 1.525217 | 0.609014 | 1.525217 | up | 1.512427 | 0.596865 | 1.512427 | up | 0 | 0.609014 | 0.596865 | RGMB     |
| 209545  | s at | 1.787152 | 0.837663 | 1.787152 | up | 1.788604 | 0.838834 | 1.788604 | up | 0 | 0.837663 | 0.838834 | RIPK2    |
| 225767  | at   | 1.657624 | 0.729116 | 1.657624 | up | 2.194876 | 1.134139 | 2.194876 | up | 0 | 0.729116 | 1.134139 | RNA45S5  |
| 210056  | at   | 1.613505 | 0.690198 | 1.613505 | up | 1.749809 | 0.807197 | 1.749809 | up | 0 | 0.690198 | 0.807197 | RND1     |
| 210426  | x at | 1.903635 | 0.928757 | 1.903635 | up | 2.050767 | 1.036163 | 2.050767 | up | 0 | 0.928757 | 1.036163 | RORA     |
| 210479  | s at | 1.727408 | 0.788609 | 1.727408 | up | 1.786068 | 0.836787 | 1.786068 | up | 0 | 0.788609 | 0.836787 | RORA     |
| 204802  | at   | 1.82936  | 0.871339 | 1.82936  | up | 1.526381 | 0.610115 | 1.526381 | up | 0 | 0.871339 | 0.610115 | RRAD     |
| 228186  | s at | 2.20634  | 1.141655 | 2.20634  | up | 1.960174 | 0.970982 | 1.960174 | up | 0 | 1.141655 | 0.970982 | RSPO3    |
| 201846  | s at | 1.623273 | 0.698905 | 1.623273 | up | 1.59132  | 0.670224 | 1.59132  | up | 0 | 0.698905 | 0.670224 | RYBP     |
| 210592  | s at | 1.687978 | 0.755296 | 1.687978 | up | 1.79851  | 0.846802 | 1.79851  | up | 0 | 0.755296 | 0.846802 | SAT1     |
| 213988  | s at | 1.739239 | 0.798456 | 1.739239 | up | 1.887175 | 0.916228 | 1.887175 | up | 0 | 0.798456 | 0.916228 | SAT1     |
| 242786  | at   | 1.980814 | 0.986094 | 1.980814 | up | 1.829007 | 0.87106  | 1.829007 | up | 0 | 0.986094 | 0.87106  | SBF2-AS1 |
| 204035  | at   | 9.621045 | 3.266194 | 9.621045 | up | 9.262951 | 3.211472 | 9.262951 | up | 0 | 3.266194 | 3.211472 | SCG2     |
| 203889  | at   | 1.613792 | 0.690455 | 1.613792 | up | 1.658536 | 0.72991  | 1.658536 | up | 0 | 0.690455 | 0.72991  | SCG5     |
| 202062  | s at | 1.657458 | 0.728972 | 1.657458 | up | 1.969565 | 0.977877 | 1.969565 | up | 0 | 0.728972 | 0.977877 | SEL1L    |
| 204614  | at   | 3.688716 | 1.883119 | 3.688716 | up | 5.197804 | 2.377902 | 5.197804 | up | 0 | 1.883119 | 2.377902 | SERPINB2 |
| 205576  | at   | 1.647035 | 0.719871 | 1.647035 | up | 1.64972  | 0.722221 | 1.64972  | up | 0 | 0.719871 | 0.722221 | SERPIND1 |
| 223195  | s at | 1.687321 | 0.754734 | 1.687321 | up | 1.717889 | 0.780637 | 1.717889 | up | 0 | 0.754734 | 0.780637 | SESN2    |
| 223196  | s at | 1.923951 | 0.944072 | 1.923951 | up | 1.867554 | 0.90115  | 1.867554 | up | 0 | 0.944072 | 0.90115  | SESN2    |
| 208381  | s at | 1.724114 | 0.785855 | 1.724114 | up | 1.688857 | 0.756047 | 1.688857 | up | 0 | 0.785855 | 0.756047 | SGPL1    |
| 204157  | s at | 1.633693 | 0.708137 | 1.633693 | up | 1.633693 | 0.708137 | 1.633693 | up | 0 | 0.708137 | 0.708137 | SIK3     |
| 207038  | at   | 2.714948 | 1.440925 | 2.714948 | up | 2.872218 | 1.522165 | 2.872218 | up | 0 | 1.440925 | 1.522165 | SLC16A6  |
| 230748  | at   | 2.201189 | 1.138283 | 2.201189 | up | 2.267336 | 1.180998 | 2.267336 | up | 0 | 1.138283 | 1.180998 | SLC16A6  |
| 205896  | at   | 2.250945 | 1.170531 | 2.250945 | up | 2.250945 | 1.170531 | 2.250945 | up | 0 | 1.170531 | 1.170531 | SLC22A4  |
| 228181  | at   | 1.523363 | 0.60726  | 1.523363 | up | 1.523363 | 0.60726  | 1.523363 | up | 0 | 0.60726  | 0.60726  | SLC30A1  |
| 200924  | s at | 1.628967 | 0.703958 | 1.628967 | up | 1.663235 | 0.733992 | 1.663235 | up | 0 | 0.703958 | 0.733992 | SLC3A2   |

|         |      |          |          |          |    |          |          |          |    |   |          |          |           |
|---------|------|----------|----------|----------|----|----------|----------|----------|----|---|----------|----------|-----------|
| 223798  | at   | 1.899516 | 0.925632 | 1.899516 | up | 1.860394 | 0.895608 | 1.860394 | up | 0 | 0.925632 | 0.895608 | SLC41A2   |
| 207528  | s at | 1.785727 | 0.836512 | 1.785727 | up | 1.989127 | 0.992135 | 1.989127 | up | 0 | 0.836512 | 0.992135 | SLC7A11   |
| 1557078 | at   | 1.55616  | 0.63799  | 1.55616  | up | 1.517273 | 0.601481 | 1.517273 | up | 0 | 0.63799  | 0.601481 | SLFN5     |
| 209897  | s at | 1.979295 | 0.984986 | 1.979295 | up | 1.979295 | 0.984986 | 1.979295 | up | 0 | 0.984986 | 0.984986 | SLIT2     |
| 228850  | s at | 1.903099 | 0.928351 | 1.903099 | up | 1.823202 | 0.866474 | 1.823202 | up | 0 | 0.928351 | 0.866474 | SLIT2     |
| 236367  | at   | 1.551945 | 0.634078 | 1.551945 | up | 1.552131 | 0.634251 | 1.552131 | up | 0 | 0.634078 | 0.634251 | SMG7      |
| 205443  | at   | 1.585896 | 0.665298 | 1.585896 | up | 1.523261 | 0.607163 | 1.523261 | up | 0 | 0.665298 | 0.607163 | SNAPC1    |
| 223773  | s at | 1.562515 | 0.64387  | 1.562515 | up | 1.537971 | 0.621028 | 1.537971 | up | 0 | 0.64387  | 0.621028 | SNHG12    |
| 65588   | at   | 1.603389 | 0.681125 | 1.603389 | up | 1.66846  | 0.738517 | 1.66846  | up | 0 | 0.681125 | 0.738517 | SNHG17    |
| 225220  | at   | 1.600214 | 0.678265 | 1.600214 | up | 1.541023 | 0.623888 | 1.541023 | up | 0 | 0.678265 | 0.623888 | SNHG8     |
| 232964  | at   | 2.906709 | 1.539387 | 2.906709 | up | 3.137171 | 1.649464 | 3.137171 | up | 0 | 1.539387 | 1.649464 | SPDYE1    |
| 229778  | at   | 3.118868 | 1.641023 | 3.118868 | up | 2.549231 | 1.350062 | 2.549231 | up | 0 | 1.641023 | 1.350062 | SPX       |
| 205499  | at   | 1.53476  | 0.618013 | 1.53476  | up | 1.53476  | 0.618013 | 1.53476  | up | 0 | 0.618013 | 0.618013 | SRPX2     |
| 225033  | at   | 1.50278  | 0.587634 | 1.50278  | up | 1.579324 | 0.659308 | 1.579324 | up | 0 | 0.587634 | 0.659308 | ST3GAL1   |
| 227179  | at   | 1.500733 | 0.585667 | 1.500733 | up | 1.652631 | 0.724764 | 1.652631 | up | 0 | 0.585667 | 0.724764 | STAU2     |
| 203439  | s at | 1.583314 | 0.662948 | 1.583314 | up | 1.706062 | 0.77067  | 1.706062 | up | 0 | 0.662948 | 0.77067  | STC2      |
| 205342  | s at | 1.634645 | 0.708978 | 1.634645 | up | 1.607629 | 0.684934 | 1.607629 | up | 0 | 0.708978 | 0.684934 | SULT1C2   |
| 244070  | at   | 2.263042 | 1.178263 | 2.263042 | up | 2.038729 | 1.02767  | 2.038729 | up | 0 | 1.178263 | 1.02767  | SYNE1     |
| 240206  | at   | 2.312661 | 1.209554 | 2.312661 | up | 2.156181 | 1.108479 | 2.156181 | up | 0 | 1.209554 | 1.108479 | TARS      |
| 225818  | s at | 1.711153 | 0.774969 | 1.711153 | up | 1.589972 | 0.669001 | 1.589972 | up | 0 | 0.774969 | 0.669001 | TBRG1     |
| 225819  | at   | 1.537563 | 0.620646 | 1.537563 | up | 1.623092 | 0.698745 | 1.623092 | up | 0 | 0.620646 | 0.698745 | TBRG1     |
| 214704  | at   | 1.569835 | 0.650613 | 1.569835 | up | 1.507262 | 0.59193  | 1.507262 | up | 0 | 0.650613 | 0.59193  | TCF25     |
| 209278  | s at | 1.501724 | 0.586619 | 1.501724 | up | 1.545746 | 0.628304 | 1.545746 | up | 0 | 0.586619 | 0.628304 | TFPI2     |
| 201042  | at   | 1.752092 | 0.809078 | 1.752092 | up | 1.571876 | 0.652487 | 1.571876 | up | 0 | 0.809078 | 0.652487 | TGM2      |
| 201108  | s at | 1.649992 | 0.722459 | 1.649992 | up | 1.735818 | 0.795616 | 1.735818 | up | 0 | 0.722459 | 0.795616 | THBS1     |
| 227866  | at   | 2.002453 | 1.001769 | 2.002453 | up | 2.002453 | 1.001769 | 2.002453 | up | 0 | 1.001769 | 1.001769 | TIAM2     |
| 212665  | at   | 1.977742 | 0.983854 | 1.977742 | up | 2.021408 | 1.015361 | 2.021408 | up | 0 | 0.983854 | 1.015361 | TIPARP    |
| 228205  | at   | 1.561116 | 0.642578 | 1.561116 | up | 1.599573 | 0.677687 | 1.599573 | up | 0 | 0.642578 | 0.677687 | TKT       |
| 214183  | s at | 1.873681 | 0.905875 | 1.873681 | up | 2.05516  | 1.039251 | 2.05516  | up | 0 | 0.905875 | 1.039251 | TKTL1     |
| 220169  | at   | 1.660769 | 0.731852 | 1.660769 | up | 1.624376 | 0.699885 | 1.624376 | up | 0 | 0.731852 | 0.699885 | TMEM156   |
| 234994  | at   | 1.666048 | 0.73643  | 1.666048 | up | 1.624232 | 0.699758 | 1.624232 | up | 0 | 0.73643  | 0.699758 | TMEM200A  |
| 202643  | s at | 3.468258 | 1.794211 | 3.468258 | up | 3.415726 | 1.772193 | 3.415726 | up | 0 | 1.794211 | 1.772193 | TNFAIP3   |
| 202644  | s at | 3.015002 | 1.592159 | 3.015002 | up | 2.87465  | 1.523387 | 2.87465  | up | 0 | 1.592159 | 1.523387 | TNFAIP3   |
| 209294  | x at | 1.662884 | 0.733687 | 1.662884 | up | 1.690302 | 0.757281 | 1.690302 | up | 0 | 0.733687 | 0.757281 | TNFRSF10B |
| 210405  | x at | 1.664054 | 0.734702 | 1.664054 | up | 1.643716 | 0.716961 | 1.643716 | up | 0 | 0.734702 | 0.716961 | TNFRSF10B |
| 210654  | at   | 1.882287 | 0.912487 | 1.882287 | up | 1.568074 | 0.648994 | 1.568074 | up | 0 | 0.912487 | 0.648994 | TNFRSF10D |
| 207536  | s at | 2.040771 | 1.029114 | 2.040771 | up | 1.779872 | 0.831774 | 1.779872 | up | 0 | 1.029114 | 0.831774 | TNFRSF9   |
| 211786  | at   | 1.626404 | 0.701686 | 1.626404 | up | 1.949944 | 0.963433 | 1.949944 | up | 0 | 0.701686 | 0.963433 | TNFRSF9   |
| 220655  | at   | 1.906413 | 0.930861 | 1.906413 | up | 1.906413 | 0.930861 | 1.906413 | up | 0 | 0.930861 | 0.930861 | TNIP3     |
| 218145  | at   | 1.880246 | 0.910921 | 1.880246 | up | 2.077897 | 1.055124 | 2.077897 | up | 0 | 0.910921 | 1.055124 | TRIB3     |
| 1555788 | a at | 1.871679 | 0.904333 | 1.871679 | up | 2.021679 | 1.015554 | 2.021679 | up | 0 | 0.904333 | 1.015554 | TRIB3     |
| 220623  | s at | 1.692377 | 0.759051 | 1.692377 | up | 1.849914 | 0.887458 | 1.849914 | up | 0 | 0.759051 | 0.887458 | TSGA10    |
| 223962  | at   | 2.244819 | 1.166599 | 2.244819 | up | 2.197774 | 1.136043 | 2.197774 | up | 0 | 1.166599 | 1.136043 | TTC29     |
| 205807  | s at | 1.844904 | 0.883545 | 1.844904 | up | 1.73819  | 0.797586 | 1.73819  | up | 0 | 0.883545 | 0.797586 | TUFT1     |

|               |          |          |          |    |          |          |          |    |   |          |          |            |
|---------------|----------|----------|----------|----|----------|----------|----------|----|---|----------|----------|------------|
| 222748 s at   | 1.73793  | 0.79737  | 1.73793  | up | 1.522571 | 0.60651  | 1.522571 | up | 0 | 0.79737  | 0.60651  | TXNL4B     |
| 221962 s at   | 1.618505 | 0.694662 | 1.618505 | up | 1.615448 | 0.691935 | 1.615448 | up | 0 | 0.694662 | 0.691935 | UBE2H      |
| 1559324 at    | 2.021165 | 1.015187 | 2.021165 | up | 1.538266 | 0.621305 | 1.538266 | up | 0 | 1.015187 | 0.621305 | USP32P2    |
| 224978 s at   | 1.629502 | 0.704431 | 1.629502 | up | 1.841728 | 0.88106  | 1.841728 | up | 0 | 0.704431 | 0.88106  | USP36      |
| 204254 s at   | 1.711097 | 0.774922 | 1.711097 | up | 1.839991 | 0.879698 | 1.839991 | up | 0 | 0.774922 | 0.879698 | VDR        |
| 1558212 at    | 1.555585 | 0.637457 | 1.555585 | up | 1.568459 | 0.649348 | 1.568459 | up | 0 | 0.637457 | 0.649348 | VLDLR-AS1  |
| 217785 s at   | 1.603124 | 0.680886 | 1.603124 | up | 1.564945 | 0.646112 | 1.564945 | up | 0 | 0.680886 | 0.646112 | YKT6       |
| 241372 at     | 1.592643 | 0.671423 | 1.592643 | up | 1.532714 | 0.616088 | 1.532714 | up | 0 | 0.671423 | 0.616088 | ZC3H6      |
| 224915 x at   | 1.612846 | 0.689609 | 1.612846 | up | 1.552758 | 0.634833 | 1.552758 | up | 0 | 0.689609 | 0.634833 | ZFAS1      |
| 226227 x at   | 1.592966 | 0.671716 | 1.592966 | up | 1.525568 | 0.609346 | 1.525568 | up | 0 | 0.671716 | 0.609346 | ZFAS1      |
| 240809 at     | 2.485791 | 1.313705 | 2.485791 | up | 2.197978 | 1.136177 | 2.197978 | up | 0 | 1.313705 | 1.136177 | ZNF295-AS1 |
| 229086 at     | 1.719164 | 0.781707 | 1.719164 | up | 1.746833 | 0.804742 | 1.746833 | up | 0 | 0.781707 | 0.804742 | ZNF436-AS1 |
| 242864 at     | 1.889578 | 0.918064 | 1.889578 | up | 1.781629 | 0.833197 | 1.781629 | up | 0 | 0.918064 | 0.833197 | ZNF554     |
| 227080 at     | 1.712514 | 0.776115 | 1.712514 | up | 1.565798 | 0.646898 | 1.565798 | up | 0 | 0.776115 | 0.646898 | ZNF697     |
| AFFX-M27830 S | 2.219857 | 1.150467 | 2.219857 | up | 4.373875 | 2.128912 | 4.373875 | up | 0 | 1.150467 | 2.128912 |            |
| AFFX-M27830 N | 1.635245 | 0.709507 | 1.635245 | up | 2.828988 | 1.500286 | 2.828988 | up | 0 | 0.709507 | 1.500286 |            |
| 216130 at     | 1.612406 | 0.689215 | 1.612406 | up | 1.653967 | 0.725931 | 1.653967 | up | 0 | 0.689215 | 0.725931 |            |
| 227943 at     | 1.789846 | 0.839835 | 1.789846 | up | 1.538231 | 0.621272 | 1.538231 | up | 0 | 0.839835 | 0.621272 |            |
| 230574 at     | 1.584466 | 0.663997 | 1.584466 | up | 1.504552 | 0.589334 | 1.504552 | up | 0 | 0.663997 | 0.589334 |            |
| 236987 at     | 1.507185 | 0.591857 | 1.507185 | up | 1.500773 | 0.585706 | 1.500773 | up | 0 | 0.591857 | 0.585706 |            |
| 238623 at     | 1.648197 | 0.720889 | 1.648197 | up | 1.576477 | 0.656704 | 1.576477 | up | 0 | 0.720889 | 0.656704 |            |
| 239715 at     | 1.728519 | 0.789537 | 1.728519 | up | 1.728519 | 0.789537 | 1.728519 | up | 0 | 0.789537 | 0.789537 |            |
| 242213 at     | 1.511751 | 0.59622  | 1.511751 | up | 1.627864 | 0.70298  | 1.627864 | up | 0 | 0.59622  | 0.70298  |            |
| 243144 at     | 1.622242 | 0.697989 | 1.622242 | up | 1.622242 | 0.697989 | 1.622242 | up | 0 | 0.697989 | 0.697989 |            |
| 243955 at     | 1.524072 | 0.607931 | 1.524072 | up | 1.69005  | 0.757066 | 1.69005  | up | 0 | 0.607931 | 0.757066 |            |
| 244247 at     | 1.800945 | 0.848754 | 1.800945 | up | 1.51444  | 0.598784 | 1.51444  | up | 0 | 0.848754 | 0.598784 |            |
| 1564807 at    | 2.965642 | 1.568345 | 2.965642 | up | 1.71893  | 0.781511 | 1.71893  | up | 0 | 1.568345 | 0.781511 |            |
| 1566897 at    | 1.623102 | 0.698754 | 1.623102 | up | 1.53131  | 0.614767 | 1.53131  | up | 0 | 0.698754 | 0.614767 |            |
| 1568513 x at  | 2.220907 | 1.151149 | 2.220907 | up | 3.323158 | 1.732555 | 3.323158 | up | 0 | 1.151149 | 1.732555 |            |
| 1569609 at    | 1.592272 | 0.671087 | 1.592272 | up | 1.72719  | 0.788427 | 1.72719  | up | 0 | 0.671087 | 0.788427 |            |
